# Supplementary material
Source: PubMed Central journal article supplement (PMC3199570)
Supplement: NIHMS189250-supplement-Supporting_Information.pdf [file NIHMS189250-supplement-Supporting_Information.pdf]

# Differential Tuning of the Electron Transfer Parameters in 1,3,5-Triarylpyrazolines: A Rational Design Approach for Optimizing the Contrast Ratio of Fluorescent Probes

John Cody, Subrata Mandal, Liuchun Yang, Christoph J. Fahrni\*

## Supporting Information

### Table of Contents

|                                                                                      |     |
|--------------------------------------------------------------------------------------|-----|
| 1. Synthetic procedures and analytical data                                          | S2  |
| 2. Geometry optimized structures for neutral pyrazolines <b>1a-j</b> and <b>2a-j</b> | S10 |
| 3. Geometry optimized structures for pyrazolines <b>1a-j</b> and <b>2a-j</b>         | S30 |
| 4. Summary of computational results for <b>1a-j</b> and <b>2a-j</b>                  | S50 |
| 5. Differential solvent stabilization energies for <b>1a-j</b> and <b>2a-j</b>       | S52 |

**Materials and Reagents.** 2-Fluorophenylhydrazine hydrochloride, 3-fluorophenylhydrazine hydrochloride, 4-fluorophenylhydrazine hydrochloride, 2,4-difluorophenylhydrazine, 2,5-difluorophenylhydrazine, 2,3,5,6-tetrafluorophenylhydrazine, pentafluorophenylhydrazine (Oakwood Products); *trans*-chalcone, 3,5-difluorophenylhydrazine hydrochloride (Aldrich). The chalcone 3-(4-dimethylamino-phenyl)-1-phenyl-propenone was synthesized according to a published procedure.<sup>1</sup> NMR:  $\delta$  in ppm vs SiMe<sub>4</sub> (0 ppm, <sup>1</sup>H, 400 MHz). MS: selected peaks; *m/z*. Melting points are uncorrected. Flash chromatography (FC): Merck silica gel (70-230 mesh). TLC: 0.25 mm, Merck silica gel 60 F<sub>254</sub>, visualizing at 254 nm or with 2% KMnO<sub>4</sub> solution.

**General Synthetic Procedure.**<sup>2</sup> All pyrazoline derivatives **1-4** were synthesized according to the following procedure: A solution of the corresponding phenylhydrazine derivative (1 mmol), chalcone (0.33 mmol), and 98% sulfuric acid (0.5 mmol) in 2.0 mL absolute ethanol was heated at reflux temperature for 8 hours. The reaction mixture was neutralized with saturated aq. NaHCO<sub>3</sub> and extracted twice with ethyl acetate. The combined organic phase was dried with anhydrous MgSO<sub>4</sub> and concentrated. The crude product was purified by flash chromatography and analytical purity was verified by reversed-phase HPLC (Varian ProStar system with UV detector, acetonitrile-water, gradient 20%  $\rightarrow$  2% water).

**1,3,5-Triphenyl-4,5-dihydro-1H-pyrazole (1a):** Yield: 91 %. M.p. 140-141 °C. *R<sub>f</sub>* 0.49 (3:1 hexanes:EtOAc). <sup>1</sup>H NMR (CDCl<sub>3</sub>, 400 MHz)  $\delta$  3.14 (dd, *J* = 17.0, 7.1 Hz, 1H), 3.84 (dd, *J* = 17.0, 12.6 Hz, 1H), 5.27 (dd, *J* = 12.6, 7.1 Hz, 1H), 6.78 (tt, *J* = 7.1, 1.1 Hz, 1H), 7.07 (d, *J* = 8.8, 2H), 7.15-7.20 (m, 2H), 7.25-7.40 (m, 8H), 7.71-7.73 (m, 2H). <sup>13</sup>C NMR (CDCl<sub>3</sub>, 100 MHz)  $\delta$  43.7, 64.5, 113.3, 119.0, 125.6, 125.7, 127.4, 128.4, 128.5, 128.8, 129.0, 132.6, 142.4, 144.7, 146.5. MS (70 eV) 298 (M<sup>+</sup>, 42), 296.1 (100). EI HRMS *m/z* calcd for [M]<sup>+</sup> C<sub>21</sub>H<sub>18</sub>N<sub>2</sub> 298.1470, found 298.1444.

**1-(2-Fluoro-phenyl)-3,5-diphenyl-4,5-dihydro-1H-pyrazole (1b):** Yield: 91%. M.p. 134-136 °C. *R<sub>f</sub>* 0.83 (5:1 hexane:EtOAc). <sup>1</sup>H-NMR (CDCl<sub>3</sub>, 400 MHz)  $\delta$  3.25 (dd, *J* = 16.8, 4.4 Hz, 1H), 3.74 (dd, *J* = 16.8, 11.8 Hz, 1H), 5.63 (ddd, *J* = 11.8, 7.9, 4.0 Hz, 1H), 6.71-6.76 (m, 1H), 6.83 (dd, *J* = 12.9, 7.8 Hz, 1H), 6.98 (t, *J* = 7.6 Hz, 1H), 7.11-7.20 (m, 5H), 7.29-7.39 (m, 3H), 7.61 (t, *J* = 8.4 Hz, 1H), 7.74 (d, *J* = 7.1 Hz, 2H). <sup>13</sup>C NMR (CDCl<sub>3</sub>, 100 MHz)  $\delta$  43.0, 66.3 (d, *J<sub>CF</sub>* = 7.5 Hz), 116.0 (d, *J<sub>CF</sub>* = 20.3 Hz), 119.9 (d, *J<sub>CF</sub>* = 3.4 Hz), 121.4 (d, *J<sub>CF</sub>* = 7.5 Hz), 124.4 (d, *J<sub>CF</sub>* = 3.1 Hz), 126.0, 126.1, 127.6, 128.59, 128.64, 128.8, 132.7, 133.2 (d, *J<sub>CF</sub>* = 9.2 Hz), 142.0, 148.2, 151.2 (d, *J<sub>CF</sub>* = 243.5 Hz). MS (70 eV) 316.1 (M<sup>+</sup>, 100), 239 (50), 109 (65). EI-HRMS *m/e* calculated for [M]<sup>+</sup> C<sub>21</sub>H<sub>17</sub>FN<sub>2</sub> 316.1376, found 316.1375.

**1-(3-Fluoro-phenyl)-3,5-diphenyl-4,5-dihydro-1H-pyrazole (1c):** Yield: 90%. M.p. 123-125 °C. *R<sub>f</sub>* 0.72 (5:1 hexanes:EtOAc). <sup>1</sup>H-NMR (CDCl<sub>3</sub>, 400 MHz)  $\delta$  3.12 (dd, *J* = 17.0, 6.6 Hz, 1H), 3.80 (dd, *J* = 17.0, 12.1 Hz, 1H), 5.20 (dd, *J* = 12.1, 6.6 Hz, 1H), 6.44 (dt, *J* = 8.2, 2.5 Hz, 1H), 6.69 (dd, *J* = 8.2, 2.2 Hz, 1H), 6.87 (td, *J* = 11.9, 2.3 Hz, 1H), 7.05 (dt, *J* = 8.2, 6.7 Hz, 1H), 7.22-7.38 (m, 8H), 7.70 (td, *J* = 7.1, 1.7 Hz, 2H). <sup>13</sup>C NMR (CDCl<sub>3</sub>)  $\delta$  43.7, 64.4, 100.7 (d, *J<sub>CF</sub>* = 26.9 Hz), 105.5 (d, *J<sub>CF</sub>* = 21.9 Hz), 108.7 (d, *J<sub>CF</sub>* = 2.3 Hz), 125.8, 125.9, 127.8, 128.6, 128.9, 129.3, 129.9 (d, *J<sub>CF</sub>* = 9.9 Hz), 132.4, 142.1, 146.3 (d, *J<sub>CF</sub>* = 10.9 Hz), 147.5, 163.7 (d, *J<sub>CF</sub>* = 242.6 Hz). MS (70 eV) 316.1 (M<sup>+</sup>, 100), 239 (45), 109 (40). EI-HRMS *m/e* calculated for [M]<sup>+</sup> C<sub>21</sub>H<sub>17</sub>FN<sub>2</sub> 316.1376, found 316.1363.

**1-(4-Fluoro-phenyl)-3,5-diphenyl-4,5-dihydro-1H-pyrazole (1d):** Yield: 30%. M.p. 112-114 °C. *R<sub>f</sub>* 0.71 (5:1 hexane:EtOAc). <sup>1</sup>H-NMR (CDCl<sub>3</sub>, 400 MHz)  $\delta$  3.11 (dd, *J* = 17.0, 7.8 Hz, 1H), 3.79 (dd, *J* = 17.0, 12.3 Hz, 1H), 5.16 (dd, *J* = 12.3, 7.8 Hz, 1H), 6.85 (t, *J* = 8.5 Hz, 2H), 6.97-7.00 (m, 2H), 7.25-7.38 (m, 8H), 7.69 (d, *J* = 7.7 Hz, 2H). <sup>13</sup>C NMR (CDCl<sub>3</sub>, 100 MHz)  $\delta$  43.7, 65.2, 114.4 (d, *J<sub>CF</sub>* = 7.5 Hz), 115.3 (d, *J<sub>CF</sub>* = 28.2 Hz), 125.7, 125.9, 127.7, 128.5, 128.6, 129.2,

132.6, 141.6 (d  $J_{CF}$  = 2.1 Hz), 142.3, 146.9, 156.7 (d,  $J_{CF}$  = 237.3 Hz). MS (70 eV) 316.1 ( $M^+$ , 100), 239.1 (45), 109 (60). EI-HRMS  $m/e$  calculated for  $[M]^+$   $C_{21}H_{17}FN_2$  316.1376, found 316.1359.

**1-(2,4-Difluoro-phenyl)-3,5-diphenyl-4,5-dihydro-1H-pyrazole (1e):** Yield: 96%. M.p. 125-127 °C.  $R_f$  0.66 (5:1 hexanes:EtOAc).  $^1H$ -NMR ( $CDCl_3$ , 400 MHz)  $\delta$  3.30 (dd,  $J$  = 16.9, 4.9 Hz, 1H), 3.75 (dd,  $J$  = 16.9, 11.5 Hz, 1H), 5.56 (ddd,  $J$  = 11.5, 4.9, 3.4 Hz, 1H), 6.62 (ddd,  $J$  = 12.1, 8.5, 2.8 Hz, 1H), 6.72 (ddt,  $J$  = 7.8, 2.8, 1.3 Hz, 1H), 7.18-7.24 (m, 5H), 7.35-7.44 (m, 3H), 7.50 (dt,  $J$  = 9.2, 6.0 Hz, 1H), 7.77 (dd,  $J$  = 8.2 Hz, 1.7 Hz, 2H).  $^{13}C$  NMR ( $CDCl_3$  100 MHz)  $\delta$  42.9, 66.7 (d,  $J_{CF}$  = 6.5 Hz), 104.2 (dd,  $J_{CF}$  = 26.5, 24.3 Hz), 111.0 (dd,  $J_{CF}$  = 21.9, 3.6 Hz), 120.9 (dd,  $J_{CF}$  = 9.0, 4.6 Hz), 126.0, 126.3, 127.8, 128.6, 128.7, 128.9, 130.0 (dd,  $J_{CF}$  = 9.8, 3.2 Hz), 132.6, 141.4, 148.8, 151.5 (dd,  $J_{CF}$  = 247.9, 12.0 Hz), 157.5 (dd,  $J_{CF}$  = 242.1, 11.0 Hz). MS (70 eV) 334 ( $M^+$ , 100), 257 (42), 127 (70). EI-HRMS  $m/e$  calculated for  $[M]^+$   $C_{21}H_{16}F_2N_2$  334.1282, found 334.1276.

**1-(2,5-Difluoro-phenyl)-3,5-diphenyl-4,5-dihydro-1H-pyrazole (1f):** Yield: 80%. M.p. 179-181 °C.  $R_f$  0.45 (3:1 hexanes:EtOAc).  $^1H$ -NMR ( $CDCl_3$ , 400 MHz)  $\delta$  3.27 (dd,  $J$  = 17.0, 3.8 Hz, 1H), 3.78 (dd,  $J$  = 17.0, 11.8, 1H), 5.68 (ddd,  $J$  = 11.8, 3.8, 3.8 Hz, 1H), 6.36-6.42 (m, 1H), 6.75 (ddd,  $J$  = 13.9, 8.9, 5.1 Hz, 1H), 7.14-7.23 (m, 5H), 7.33-7.43 (m, 4H), 7.35 (dd,  $J$  = 8.2, 1.7 Hz, 2H).  $^{13}C$  NMR ( $CDCl_3$  100 MHz)  $\delta$  43.2, 65.8 (d,  $J_{CF}$  = 8.4 Hz), 106.1 (dd,  $J_{CF}$  = 28.7, 4.1 Hz), 106.7 (dd,  $J_{CF}$  = 24.5, 7.7 Hz), 116.5 (dd,  $J_{CF}$  = 23.2, 10.2 Hz), 125.9, 126.1, 127.7, 128.6, 128.7, 129.2, 132.2, 134.2 (t,  $J_{CF}$  = 11.1 Hz), 141.8, 146.7 (dd,  $J_{CF}$  = 238.6, 2.7 Hz), 149.0, 159.2 (dd,  $J_{CF}$  = 239.9, 1.8 Hz). MS (70 eV) 334.1 ( $M^+$ , 100), 127 (40). EI-HRMS  $m/e$  calculated for  $[M]^+$   $C_{21}H_{16}F_2N_2$  334.1282, found 334.1287.

**1-(3,5-Difluoro-phenyl)-3,5-diphenyl-4,5-dihydro-1H-pyrazole (1g):** Yield: 79%. M.p. 139-140 °C.  $R_f$  0.68 (5:1 hexanes:EtOAc).  $^1H$ -NMR ( $CDCl_3$ , 400 MHz)  $\delta$  3.13 (dd,  $J$  = 17.3 Hz, 6.6 Hz, 1H), 3.82 (dd,  $J$  = 17.3 Hz, 12.3 Hz, 1H), 5.17 (dd,  $J$  = 12.3 Hz, 6.6 Hz, 1H), 6.17 (tt,  $J$  = 9.1 Hz, 2.3 Hz, 1H), 6.52-6.55 (m, 2H), 7.23-7.28 (m, 3H), 7.31-7.40 (m, 5H), 7.69 (dd,  $J$  = 8.2 Hz, 1.6 Hz, 2H).  $^{13}C$  NMR ( $CDCl_3$  100 MHz)  $\delta$  43.8, 64.2, 93.8 (t,  $J_{CF}$  = 26.4 Hz), 96.3 (dd,  $J_{CF}$  = 20.9, 9.2 Hz), 125.7, 126.0, 128.0, 128.6, 129.2, 129.4, 132.1, 141.6, 146.6 (t,  $J_{CF}$  = 13.7 Hz), 148.4, 163.7 (dd,  $J_{CF}$  = 243.5, 15.5 Hz). MS (70 eV) 334.1 ( $M^+$ , 100), 257.1 (35). EI-HRMS  $m/e$  calculated for  $[M]^+$   $C_{21}H_{16}F_2N_2$  334.1282, found 334.1282.

**3,5-Diphenyl-1-(2,4,5-trifluoro-phenyl)-4,5-dihydro-1H-pyrazole (1h):** Yield: 65%. M.p. 134-136 °C.  $R_f$  0.35 (10:1 hexanes:EtOAc).  $^1H$  NMR ( $CDCl_3$ , 400 MHz)  $\delta$  3.30 (dd,  $J$  = 17.0, 4.1 Hz, 1H), 3.76 (dd,  $J$  = 17.0, 11.7 Hz, 1H), 5.57 (ddd,  $J$  = 11.7, 4.0, 4.0 Hz, 1H), 6.69 (ddd,  $J$  = 11.6, 10.1, 7.1 Hz, 1H), 7.12-7.23 (m, 5H), 7.34-7.42 (m, 3H), 7.47 (dt,  $J$  = 12.3, 8.1 Hz, 1H), 7.72-7.75 (m, 2H).  $^{13}C$  NMR ( $CDCl_3$  100 MHz)  $\delta$  43.0, 66.0 (d,  $J_{CF}$  = 7.4 Hz), 105.6 (ddd,  $J_{CF}$  = 25.9, 21.4, 1.1 Hz), 107.7 (dd,  $J_{CF}$  = 23.4, 4.8 Hz), 126.0, 127.8, 128.6, 128.7, 129.2, 129.9 (ddd,  $J_{CF}$  = 11.3, 7.8, 3.3 Hz), 132.1, 141.2, 143.6 (ddd,  $J_{CF}$  = 243.5, 14.5, 11.4 Hz), 145.4 (ddd,  $J_{CF}$  = 242.8, 8.6, 2.5 Hz), 146.6 (ddd,  $J_{CF}$  = 242.5, 12.9, 3.1 Hz), 149.4. MS (70 eV) 352.1 ( $M^+$ , 100), 275 (14), 206 (16), 145 (17). EI HRMS  $m/e$  calcd for  $[M]^+$   $C_{21}H_{15}F_3N_2$  352.1187, found 352.1184.

**3,5-Diphenyl-1-(2,3,5,6-tetrafluoro-phenyl)-4,5-dihydro-1H-pyrazole (1i):** Yield: 73%. M.p. 150-151 °C.  $R_f$  0.80 (3:1 hexanes:EtOAc).  $^1H$ -NMR ( $CDCl_3$ , 400 MHz)  $\delta$  3.30 (dd,  $J$  = 17.0, 7.3 Hz, 1H), 3.76 (dd,  $J$  = 17.0, 11.7 Hz, 1H), 5.52 (dd,  $J$  = 11.7, 7.3 Hz, 1H), 6.62 (tt,  $J$  = 9.8, 7.0 Hz, 1H), 7.20-7.30 (m, 5H), 7.35-7.42 (m, 3H), 7.70-7.73 (m, 2H).  $^{13}C$  NMR ( $CDCl_3$  100 MHz)  $\delta$  42.6, 67.4 (t,  $J_{CF}$  = 3.5 Hz), 99.9 (t,  $J_{CF}$  = 23.1 Hz), 124.9 (tt,  $J_{CF}$  = 10.5, 2.0 Hz), 126.0, 126.5, 128.3, 128.6, 128.9, 129.2, 132.1, 140.6, 141.3 (ddt,  $J_{CF}$  = 248.7, 14.7, 4.0 Hz), 146.3 (dtd,  $J_{CF}$  = 246.2, 12.9, 3.8 Hz), 149.6. MS (70 eV) 370.1 ( $M^+$ , 100), 163 (38). EI-HRMS  $m/e$  calculated for  $[M]^+$   $C_{21}H_{14}F_4N_2$  370.1093, found 370.1105.

**1-Pentafluorophenyl-3,5-diphenyl-4,5-dihydro-1H-pyrazole (1j):** Yield: 70%. M.p. 164-165 °C. *R<sub>f</sub>* 0.43 (4:1 hexanes:EtOAc). <sup>1</sup>H-NMR (CDCl<sub>3</sub>, 400 MHz) δ 3.29 (dd, *J* = 16.9, 8.4 Hz, 1H), 3.73 (dd, *J* = 16.9, 11.5 Hz, 1H), 5.37 (dd, *J* = 11.5, 8.4 Hz, 1H), 7.23-7.31 (m, 5H), 7.35-7.40 (m, 3H), 7.68-7.71 (m, 2H). <sup>13</sup>C NMR (CDCl<sub>3</sub>, 100 MHz) δ 42.8, 68.2 (t, *J* = 2.8 Hz), 120.3 (m, CF), 125.8, 126.5, 128.3, 128.5, 128.8, 129.1, 131.8, 137.8 (ddt, *J* = 244.1, 12.1, 3.1 Hz), 138.0 (ddd, *J* = 238.1, 7.6, 3.1 Hz), 139.9, 142.6 (dtd, *J* = 250.2, 12.1, 3.1 Hz), 150.1. MS (70 eV) 388.1 (M<sup>+</sup>, 100), 181 (60). EI-HRMS *m/e* calculated for [M]<sup>+</sup> C<sub>21</sub>H<sub>13</sub>F<sub>5</sub>N<sub>2</sub> 388.0999, found 388.1015.

**4-(1,5-Diphenyl-4,5-dihydro-1H-pyrazol-3-yl)benzotrile (2a):** Yield: 76% M.p. 145-146 °C. *R<sub>f</sub>* 0.50 (5:1 hexanes:EtOAc). <sup>1</sup>H NMR (CDCl<sub>3</sub>, 400 MHz) δ 3.13 (dd, *J* = 17.0, 7.1 Hz, 1H), 3.83 (dd, *J* = 17.0, 12.7, 1H), 5.38 (dd, *J* = 12.7, 7.1 Hz, 1H), 6.83 (t, *J* = 7.3 Hz, 1H), 7.08 (dd, *J* = 8.8, 1.0 Hz, 2H), 7.18-7.22 (m, 2H), 7.25-7.36 (m, 5H), 7.64 (d, *J* = 8.6 Hz, 2H), 7.73 (d, *J* = 8.6 Hz, 2H). <sup>13</sup>C NMR (CDCl<sub>3</sub>, 100 MHz) δ 42.8, 64.7, 111.0, 113.6, 118.9, 120.0, 125.67, 125.74, 127.8, 129.0, 129.2, 132.2, 137.0, 141.8, 143.7, 144.2; MS (70 eV) 323 (M<sup>+</sup>, 100), 246 (48) 91 (35). EI HRMS *m/e* calcd for [M]<sup>+</sup> C<sub>22</sub>H<sub>17</sub>N<sub>3</sub> 323.1422, found 323.1420.

**4-(1-(2-Fluorophenyl)-4,5-dihydro-5-phenyl-1H-pyrazol-3-yl)benzotrile (2b):** Yield: 80%. M.p. 139-141 °C. *R<sub>f</sub>* 0.40 (3:1 hexanes:EtOAc). <sup>1</sup>H-NMR (CDCl<sub>3</sub>, 400 MHz) δ 3.22 (dd, *J* = 16.9 Hz, 4.7 Hz, 1H), 3.73 (dd, *J* = 16.9, 12.1 Hz, 1H), 5.70 (ddd, *J* = 12.1, 4.7, 3.4 Hz, 1H), 6.76-6.89 (m, 2H), 7.00 (dt, *J* = 8.4 Hz, 1.6 Hz, 1H), 7.13-7.23 (m, 5H), 7.58 (dt, *J* = 8.4 Hz, 1.5 Hz, 1H), 7.62 (d, *J* = 8.5 Hz, 2H), 7.76 (d, *J* = 8.5 Hz, 2H). <sup>13</sup>C NMR (CDCl<sub>3</sub>, 100 MHz) δ 42.3, 66.5 (d, *J<sub>CF</sub>* = 7.6 Hz), 111.1, 116.0 (d, *J<sub>CF</sub>* = 20.5 Hz), 118.7, 119.8 (d, *J<sub>CF</sub>* = 3.0 Hz), 122.1 (d, *J<sub>CF</sub>* = 7.5 Hz), 124.2 (d, *J<sub>CF</sub>* = 3.2 Hz), 125.8, 127.6, 128.5, 131.9 (d, *J<sub>CF</sub>* = 9.0 Hz), 132.1, 136.6, 141.1, 145.5, 150.0 (d, *J<sub>CF</sub>* = 243.9 Hz). MS (70 eV) 341.1 (M<sup>+</sup>, 100), 264.1 (50), 109 (48). EI-HRMS *m/e* calculated for [M]<sup>+</sup> C<sub>22</sub>H<sub>16</sub>FN<sub>3</sub> 341.1328, found 341.1338.

**4-[1-(3-Fluoro-phenyl)-5-phenyl-4,5-dihydro-1H-pyrazol-3-yl]-benzotrile (2c):** Yield: 87%. M.p. 189-191 °C. *R<sub>f</sub>* 0.40 (3:1 hexanes:EtOAc). <sup>1</sup>H-NMR (CDCl<sub>3</sub>, 400 MHz) δ 3.15 (dd, *J* = 17.2, 6.8 Hz, 1H), 3.86 (dd, *J* = 17.2, 12.6 Hz, 1H), 5.36 (dd, *J* = 12.6, 6.8 Hz, 1H), 6.51 (dt, *J* = 8.2, 2.2 Hz, 1H), 6.73 (dd, *J* = 8.2, 2.2 Hz, 1H), 6.89 (td, *J* = 11.5, 2.2 Hz, 1H), 7.10 (dd, *J* = 14.9, 8.2 Hz, 1H), 7.28-7.31 (m, 3H), 7.36 (t, *J* = 7.1 Hz, 2H), 7.66 (d, *J* = 8.2 Hz, 2H), 7.78 (d, *J* = 8.2 Hz, 2H). <sup>13</sup>C NMR (CDCl<sub>3</sub>, 100 MHz) δ 43.0, 64.6, 101.0 (d, *J<sub>CF</sub>* = 26.9 Hz), 106.3 (d, *J<sub>CF</sub>* = 21.5 Hz), 108.9 (d, *J<sub>CF</sub>* = 2.3 Hz), 111.3, 118.7, 125.5, 125.8, 127.9, 129.2, 130.0 (d, *J<sub>CF</sub>* = 9.9 Hz), 132.1, 136.5, 141.1, 145.0, 145.1 (d, *J<sub>CF</sub>* = 10.9 Hz), 163.3 (d, *J<sub>CF</sub>* = 242.6 Hz). MS (70 eV) 341 (M<sup>+</sup>, 100), 264 (40), 109 (40). EI-HRMS *m/e* calculated for [M]<sup>+</sup> C<sub>22</sub>H<sub>16</sub>FN<sub>3</sub> 341.1328, found 341.1318.

**4-[1-(4-Fluoro-phenyl)-5-phenyl-4,5-dihydro-1H-pyrazol-3-yl]-benzotrile (2d):** Yield: 80%. M.p. 144-146 °C. *R<sub>f</sub>* 0.40 (3:1 hexanes:EtOAc). <sup>1</sup>H-NMR (CDCl<sub>3</sub>, 400 MHz) δ 3.14 (dd, *J* = 17.0, 7.7 Hz, 1H), 3.84 (dd, *J* = 17.0, 12.1 Hz, 1H), 5.33 (dd, *J* = 12.1, 7.7 Hz, 1H), 6.89 (dd, *J* = 9.2, 8.4 Hz, 2H), 7.01 (dd, *J* = 9.2, 4.7 Hz, 2H), 7.27-7.38 (m, 5H), 7.64 (d, *J* = 8.6 Hz, 2H), 7.76 (d, *J* = 8.6 Hz, 2H). <sup>13</sup>C NMR (CDCl<sub>3</sub>, 100 MHz) δ 43.0, 65.3, 111.0, 114.6 (d, *J<sub>CF</sub>* = 7.5 Hz), 115.4 (d, *J<sub>CF</sub>* = 22.3 Hz), 118.8, 125.6, 127.8, 129.2, 132.1, 136.7, 140.2 (d, *J<sub>CF</sub>* = 2.0 Hz), 141.3, 144.2, 157.0 (d, *J<sub>CF</sub>* = 238.1 Hz). MS (70 eV) 341.1 (M<sup>+</sup>, 100), 264.1 (50), 109 (48). EI-HRMS *m/e* calculated for [M]<sup>+</sup> C<sub>22</sub>H<sub>16</sub>FN<sub>3</sub> 341.1328, found 341.1338.

**4-[1-(2,4-Difluoro-phenyl)-5-phenyl-4,5-dihydro-1H-pyrazol-3-yl]-benzotrile (2e):** Yield: 76%. M.p. 179-181 °C. *R<sub>f</sub>* 0.44 (3:1 hexanes:EtOAc). <sup>1</sup>H-NMR (CDCl<sub>3</sub>, 400 MHz) δ 3.29 (dd, *J* = 17.0, 5.5 Hz, 1H), 3.77 (dd, *J* = 17.0, 12.1 Hz, 1H), 5.63 (ddd, *J* = 12.1, 5.5, 3.3 Hz, 1H), 6.67 (ddd, *J* = 12.1, 8.2, 2.7 Hz, 1H), 6.76 (ddt, *J* = 7.7, 2.7, 1.3 Hz, 1H), 7.15-7.24 (m, 5H), 7.48

(dt,  $J = 9.2, 5.9$  Hz, 1H), 7.67 (d,  $J = 8.6$  Hz, 2H), 7.80 (d,  $J = 8.6$  Hz, 2H).  $^{13}\text{C}$  NMR ( $\text{CDCl}_3$  100 MHz)  $\delta$  42.3, 67.1 (d,  $J_{\text{CF}} = 6.3$  Hz), 104.3 (dd,  $J_{\text{CF}} = 26.2, 24.4$  Hz), 111.1 (dd,  $J_{\text{CF}} = 21.5, 3.1$  Hz), 111.4, 118.8, 121.0 (dd,  $J_{\text{CF}} = 8.9, 4.3$  Hz), 125.9, 126.1, 128.0, 128.7, 128.8 (dd,  $J_{\text{CF}} = 9.6, 3.5$  Hz), 132.2, 136.7, 140.7, 146.2, 151.4 (dd,  $J_{\text{CF}} = 248.5, 11.7$  Hz), 157.8 (dd,  $J_{\text{CF}} = 243.6, 11.1$  Hz). MS (70 eV) 359.1 ( $\text{M}^+$ , 100), 282 (40), 127 (50). EI-HRMS  $m/e$  calculated for  $[\text{M}]^+$   $\text{C}_{22}\text{H}_{15}\text{F}_2\text{N}_3$  359.1234, found 359.1189.

**4-[1-(2,5-Difluoro-phenyl)-5-phenyl-4,5-dihydro-1H-pyrazol-3-yl]-benzotrile (2f):** Yield: 87%. M.p. 189-191 °C.  $R_f$  0.45 (3:1 hexanes:EtOAc).  $^1\text{H}$ -NMR ( $\text{CDCl}_3$ , 400 MHz)  $\delta$  3.26 (dd,  $J = 17.0, 3.8$  Hz, 1H), 3.80 (dd,  $J = 17.0, 12.1$  Hz, 1H), 5.77 (ddd,  $J = 12.1, 3.8, 3.8$  Hz, 1H), 6.47 (tdd,  $J = 8.9, 7.4, 3.2$  Hz, 1H), 6.80 (ddd,  $J = 12.1, 9.0, 5.0$  Hz, 1H), 7.13-7.16 (m, 2H), 7.21-7.25 (m, 3H), 7.36 (ddd,  $J = 9.9, 6.6, 3.3$  Hz, 1H), 7.68 (d,  $J = 8.6$  Hz, 2H), 7.81 (d,  $J = 8.6$  Hz, 2H).  $^{13}\text{C}$  NMR ( $\text{CDCl}_3$  100 MHz)  $\delta$  42.6, 66.2 (d,  $J_{\text{CF}} = 8.5$  Hz), 106.2 (dd,  $J_{\text{CF}} = 28.5, 3.5$  Hz), 107.6 (dd,  $J_{\text{CF}} = 24.4, 7.6$  Hz), 111.7, 116.7 (dd,  $J_{\text{CF}} = 23.0, 9.9$  Hz), 118.7, 125.6, 126.0, 127.8, 128.7, 132.2, 132.9 (t,  $J_{\text{CF}} = 11.1$  Hz), 136.3, 140.9, 146.4, 146.5 (dd,  $J_{\text{CF}} = 241.2, 2.3$  Hz), 158.8 (dd,  $J_{\text{CF}} = 241.4, 1.9$  Hz). MS (70 eV) 359.1 ( $\text{M}^+$ , 100), 282 (40), 127 (50). EI-HRMS  $m/e$  calculated for  $[\text{M}]^+$   $\text{C}_{22}\text{H}_{15}\text{F}_2\text{N}_3$  359.1234, found 359.1189.

**4-[1-(3,5-Difluoro-phenyl)-5-phenyl-4,5-dihydro-1H-pyrazol-3-yl]-benzotrile (2g):** Yield: 76%. M.p. 224-226 °C  $R_f$  0.45 (3:1 hexanes:EtOAc).  $^1\text{H}$ -NMR ( $\text{CDCl}_3$ , 400 MHz)  $\delta$  3.16 (dd,  $J = 17.6, 6.6$  Hz, 1H), 3.87 (dd,  $J = 17.6, 12.6$  Hz, 1H), 5.32 (dd,  $J = 12.6, 6.6$  Hz, 1H), 6.25 (tt,  $J = 9.0, 2.3$  Hz, 1H), 6.57 (dd,  $J = 9.9, 2.2$  Hz, 2H), 7.24-7.39 (m, 5H), 7.67 (d,  $J = 8.6$  Hz, 2H), 7.79 (d,  $J = 8.6$  Hz, 2H).  $^{13}\text{C}$  NMR ( $\text{CDCl}_3$  100 MHz)  $\delta$  43.2, 64.5, 94.8 (t,  $J_{\text{CF}} = 26.1$  Hz), 96.6 (dd,  $J_{\text{CF}} = 20.7, 9.2$  Hz), 111.8, 118.6, 125.4, 126.0, 128.1, 129.3, 132.2, 136.1, 140.6, 145.5 (t,  $J_{\text{CF}} = 13.6$  Hz), 146.0, 163.4 (dd,  $J_{\text{CF}} = 243.6, 15.3$  Hz). MS (70 eV) 359 ( $\text{M}^+$ , 100), 282 (40), 127 (40). EI-HRMS  $m/e$  calculated for  $[\text{M}]^+$   $\text{C}_{22}\text{H}_{15}\text{F}_2\text{N}_3$  359.1234, found 359.1212.

**4-[5-Phenyl-1-(2,4,5-trifluoro-phenyl)-4,5-dihydro-1H-pyrazol-3-yl]-benzotrile (2h):** Yield: 30%. M.p. 130-132 °C;  $R_f$  0.31 (5:1 hexanes:EtOAc);  $^1\text{H}$  NMR ( $\text{CDCl}_3$ , 400 MHz)  $\delta$  3.29 (dd,  $J = 17.0, 4.4$  Hz, 1H), 3.78 (dd,  $J = 17.0, 12.1$  Hz, 1H), 5.67 (dt,  $J = 12.1, 3.8$  Hz, 1H), 6.69-6.77 (m, 1H), 7.12 (dd,  $J = 8.2, 2.2$  Hz, 1H), 7.21-7.21 (m, 3H), 7.42-7.47 (m, 2H), 7.67 (d,  $J = 8.2$  Hz, 2H), 7.80 (d,  $J = 8.2$  Hz, 2H);  $^{13}\text{C}$  NMR ( $\text{CDCl}_3$ , 100 MHz)  $\delta$  42.4, 66.5 (d,  $J_{\text{CF}} = 7.7$  Hz), 105.8, (ddd,  $J_{\text{CF}} = 26.9, 22.1, 1.1$  Hz), 107.9 (dd,  $J_{\text{CF}} = 23.4, 4.5$  Hz), 111.8, 118.7, 125.9, 126.1, 128.1, 128.9, 128.92 (dd, not resolved), 132.2, 136.3, 140.6, 144.1 (ddd,  $J_{\text{CF}} = 244.9, 14.9, 11.3$  Hz), 145.6 (ddd,  $J_{\text{CF}} = 243.6, 8.9, 2.6$  Hz), 146.7 (ddd,  $J_{\text{CF}} = 242.6, 12.8, 3.1$  Hz), 146.9. MS (70 eV) 377.2 ( $\text{M}^+$ , 100), 300.1 (64), 231.1 (35), 145 (83). EI HRMS  $m/e$  calcd for  $[\text{M}]^+$   $\text{C}_{22}\text{H}_{14}\text{N}_3\text{F}_3$  377.1140, found 377.1107.

**4-[5-Phenyl-1-(2,3,5,6-tetrafluoro-phenyl)-4,5-dihydro-1H-pyrazol-3-yl]-benzotrile (2i):** Yield: 70%. M.p. 192-194 °C  $R_f$  0.53 (3:1 hexane:EtOAc).  $^1\text{H}$ -NMR ( $\text{CDCl}_3$ , 400 MHz)  $\delta$  3.31 (dd,  $J = 17.0$  Hz,  $J = 7.1$  Hz, 1H), 3.78 (dd,  $J = 17.0$  Hz, 12.1 Hz, 1H), 5.60 (dd,  $J = 12.1$  Hz, 7.1 Hz, 1H), 6.69 (tt,  $J_{\text{HF}} = 9.8, 7.1$  Hz, 1H), 7.28-7.29 (m, 5H), 7.68 (d,  $J = 8.2$  Hz, 2H), 7.79 (d,  $J = 8.8$  Hz, 2H);  $^{13}\text{C}$  NMR ( $\text{CDCl}_3$  100 MHz)  $\delta$  42.0, 67.7 (t,  $J_{\text{CF}} = 3.5$  Hz), 100.6 (t  $J_{\text{CF}} = 23.2$  Hz), 111.8, 118.6, 124.0 (tt,  $J_{\text{CF}} = 11.0, 2.6$  Hz), 126.0, 126.2, 128.4, 128.9, 132.2, 136.1, 139.8, 141.1 (ddt,  $J_{\text{CF}} = 248.6, 15.0, 3.8$  Hz), 146.1 (dtd,  $J_{\text{CF}} = 246.0, 13.1, 4.0$  Hz), 147.2. MS (70 eV) 395.1 ( $\text{M}^+$ , 100), 231 (45), 163 (55). EI-HRMS  $m/e$  calculated for  $[\text{M}]^+$   $\text{C}_{22}\text{H}_{13}\text{N}_3\text{F}_4$  395.1046, found 395.1069.

**4-(1-Pentafluorophenyl-5-phenyl-4,5-dihydro-1H-pyrazol-3-yl)-benzotrile (2j):** Yield: 70%. mp 131-133 °C  $R_f$  0.53 (3:1 hexanes:EtOAc).  $^1\text{H}$ -NMR ( $\text{CDCl}_3$ , 400 MHz)  $\delta$  3.31 (dd,  $J = 17.0$  Hz, 7.1 Hz, 1H), 3.78 (dd,  $J = 17.0$  Hz, 12.1 Hz, 1H), 5.60 (dd,  $J = 12.1$  Hz, 7.1 Hz, 1H), 7.28-

7.29 (m, 5H), 7.68 (d,  $J = 8.2$  Hz, 2H), 7.79 (d,  $J = 8.2$  Hz, 2H);  $^{13}\text{C}$  NMR ( $\text{CDCl}_3$  100 MHz)  $\delta$  42.1, 68.4 (t,  $J_{\text{CF}} = 2.9$  Hz), 112.0, 118.6, 119.4 (m), 126.0, 126.4, 128.6, 128.9, 132.2, 136.1, 137.7 (d,  $J_{\text{CF}} = 248$  Hz), 138.3 (m, CF), 142.4 (d,  $J_{\text{CF}} = 248$  Hz, CF), 147.7. MS (70 eV) 395.1 ( $\text{M}^+$ , 100), 231 (45), 163 (55). EI-HRMS  $m/e$  calculated for  $[\text{M}]^+$   $\text{C}_{22}\text{H}_{13}\text{N}_3\text{F}_4$  395.1046, found 395.1069.

**4-(1,3-Diphenyl-4,5-dihydro-1H-pyrazol-5-yl)-N,N-dimethylaniline (3a):** M.p. 123-125°C.  $^1\text{H}$ -NMR ( $\text{CDCl}_3$ , 400 MHz)  $\delta$  2.92 (s, 6H), 3.12 (dd,  $J = 17.1, 7.3$  Hz, 1H), 3.78 (dd,  $J = 17.1, 12.2$  Hz, 1H), 5.19 (dd,  $J = 12.2, 7.3$  Hz, 1H), 6.68 (d,  $J = 8.6$  Hz, 2H), 6.78 (t,  $J = 14.2$  Hz, 1H), 7.11 (d,  $J = 7.6$  Hz, 2H), 7.15-7.19 (m, 4H), 7.29-7.39 (m, 3H), 7.72 (d,  $J = 7.6$  Hz, 2H).  $^{13}\text{C}$  NMR ( $\text{CDCl}_3$  100 MHz)  $\delta$  40.6, 43.6, 64.1, 112.9, 113.4, 118.8, 125.7, 126.7, 128.4, 128.5, 128.8, 130.2, 133.0, 145.0, 146.7, 149.9. MS (70 eV) 341 ( $\text{M}^+$ , 100), 221 (12), 146 (32), 91 (18). EI HRMS  $m/e$  calcd for  $[\text{M}]^+$   $\text{C}_{23}\text{H}_{23}\text{N}_3$  341.1892, found 341.1903.

**4-(1-(2-Fluorophenyl)-3-phenyl-4,5-dihydro-1H-pyrazol-5-yl)-N,N-dimethylaniline (3b):** M.p. 109-111°C.  $^1\text{H}$ -NMR ( $\text{CDCl}_3$ , 400 MHz)  $\delta$  2.81 (s, 6H), 3.24 (dd,  $J = 16.8, 4.4$  Hz, 1H), 3.68 (dd,  $J = 16.8, 11.6$  Hz, 1H), 5.54 (ddd,  $J = 11.6, 4.4, 3.8$  Hz, 1H), 6.50 (d,  $J = 8.8$  Hz, 2H), 6.70-6.76 (m, 1H), 6.85 (ddd,  $J = 12.8, 8.1, 1.3$ , 1H), 6.96 (ddd,  $J = 9.8, 9.8, 1.3$  Hz, 1H), 7.03 (d,  $J = 8.6$  Hz, 2H), 7.29-7.39 (m, 3H), 7.58 (ddd,  $J = 8.4, 8.4, 1.5$  Hz, 1H), 7.74 (dd,  $J = 8.5, 1.2$  Hz, 2H).  $^{13}\text{C}$  NMR ( $\text{CDCl}_3$  100 MHz)  $\delta$  40.4, 42.8, 65.9 (d,  $J_{\text{CF}} = 7.0$  Hz), 112.1, 115.7 (d,  $J_{\text{CF}} = 20.3$  Hz), 119.8 (d,  $J_{\text{CF}} = 3.4$  Hz), 121.1 (d,  $J_{\text{CF}} = 7.2$  Hz), 124.1 (d,  $J_{\text{CF}} = 3.0$  Hz), 125.7, 126.9, 128.3, 128.4, 129.4, 132.7, 133.2 (d,  $J_{\text{CF}} = 9.2$  Hz), 148.2, 149.6, 151.2 (d,  $J_{\text{CF}} = 243.4$  Hz). MS (70 eV) 359 ( $\text{M}^+$ , 100), 257 (19), 249 (16), 147 (70), 109 (24). EI HRMS  $m/e$  calcd for  $[\text{M}]^+$   $\text{C}_{23}\text{H}_{22}\text{FN}_3$  359.1798, found 359.1757.

**4-(1-(4-Fluorophenyl)-3-phenyl-4,5-dihydro-1H-pyrazol-5-yl)-N,N-dimethylaniline (3d):** M.p. 135-137°C.  $^1\text{H}$ -NMR ( $\text{CDCl}_3$ , 400 MHz)  $\delta$  2.88 (s, 6H), 3.08 (dd,  $J = 17.0, 7.9$  Hz, 1H), 3.71 (dd,  $J = 17.0, 12.1$  Hz, 1H), 5.06 (dd,  $J = 12.1, 7.9$  Hz, 1H), 6.65 (d,  $J = 8.5$  Hz, 2H), 6.84 (t,  $J = 8.7$  Hz, 2H), 7.02 (dd,  $J = 8.7, 4.4$  Hz, 2H), 7.14 (d,  $J = 8.5$  Hz, 2H), 7.26-7.36 (m, 3H), 7.68 (d,  $J = 7.8$  Hz, 2H).  $^{13}\text{C}$  NMR ( $\text{CDCl}_3$  100 MHz)  $\delta$  40.5, 43.8, 64.9, 112.7, 114.4 (d,  $J_{\text{CF}} = 7.2$  Hz), 115.1 (d,  $J_{\text{CF}} = 22.2$  Hz), 125.5, 126.7, 128.28, 128.33, 129.6, 132.7, 141.6 (d,  $J_{\text{CF}} = 2.0$  Hz), 146.7, 149.8, 156.5 (d,  $J_{\text{CF}} = 236.4$  Hz). MS (70 eV) 359 ( $\text{M}^+$ , 100), 239 (12), 147 (48), 109 (26). EI HRMS  $m/e$  calcd for  $[\text{M}]^+$   $\text{C}_{23}\text{H}_{22}\text{FN}_3$  359.1798, found 359.1785.

**4-(1-(2,4-Difluorophenyl)-3-phenyl-4,5-dihydro-1H-pyrazol-5-yl)-N,N-dimethylaniline (3e):** M.p. 128-130°C.  $^1\text{H}$ -NMR ( $\text{CDCl}_3$ , 400 MHz)  $\delta$  2.85 (s, 6H), 3.29 (dd,  $J = 16.8, 4.8$  Hz, 1H), 3.70 (dd,  $J = 16.8, 11.5$  Hz, 1H), 5.44 (ddd,  $J = 16.8, 4.8, 3.5$  Hz, 1H), 6.52 (d,  $J = 8.8$  Hz, 2H), 6.64 (ddd,  $J = 12.0, 8.7, 2.8$  Hz, 1H), 6.70 (dddd,  $J = 9.1, 7.8, 2.8, 1.3$  Hz, 1H), 7.02 (d,  $J = 8.6$  Hz, 2H), 7.31-7.41 (m, 3H), 7.46 (td,  $J = 9.2, 6.0$  Hz, 1H), 7.74 (dd,  $J = 8.5, 1.5$  Hz, 2H).  $^{13}\text{C}$  NMR ( $\text{CDCl}_3$  100 MHz)  $\delta$  40.4, 42.7, 66.5 (d,  $J_{\text{CF}} = 5.9$  Hz), 104.0 (dd,  $J_{\text{CF}} = 25.9, 24.5$  Hz), 110.7 (dd,  $J_{\text{CF}} = 21.6, 3.3$  Hz), 112.1, 120.8 (dd,  $J_{\text{CF}} = 8.8, 4.6$  Hz), 125.7, 127.2, 128.4, 128.5, 128.7 (?), 130.1 (dd,  $J_{\text{CF}} = 9.4, 3.6$  Hz), 132.6, 148.8, 149.7, 151.4 (dd,  $J_{\text{CF}} = 258.6, 11.7$  Hz), 157.2 (dd,  $J_{\text{CF}} = 252.1, 10.9$  Hz). MS (70 eV) 377 ( $\text{M}^+$ , 100), 249 (18), 146 (44). EI HRMS  $m/e$  calcd for  $[\text{M}]^+$   $\text{C}_{23}\text{H}_{21}\text{F}_2\text{N}_3$  377.1704, found 377.1721.

**4-(1-(Pentafluorophenyl)-3-phenyl-4,5-dihydro-1H-pyrazol-5-yl)-N,N-dimethylaniline (3j):** M.p. 90-92°C.  $^1\text{H}$ -NMR ( $\text{CDCl}_3$ , 400 MHz)  $\delta$  2.89 (s, 6H), 3.29 (dd,  $J = 16.9, 8.0$  Hz, 1H), 3.68 (dd,  $J = 16.9, 11.4$  Hz, 1H), 5.30 (dd,  $J = 11.4, 8.0$  Hz, 1H), 6.58 (d,  $J = 8.8$  Hz, 2H), 7.14 (d,  $J = 8.7$  Hz, 2H), 7.35-7.42 (m, 3H), 7.70 (dd,  $J = 8.3, 1.6$  Hz, 2H).  $^{13}\text{C}$  NMR ( $\text{CDCl}_3$  100 MHz)  $\delta$  40.4, 42.4, 67.9 (t,  $J_{\text{CF}} = 2.8$  Hz), 112.2, 120.5 (td,  $J_{\text{CF}} = 11.8, 3.6$  Hz, CF), 125.8, 127.1, 127.5, 128.5, 128.9, 132.1, 137.6 (m, CF), 137.7 (m, CF), 142.5 (dm,  $J_{\text{CF}} = 249$  Hz, CF), 150.0, 150.2. MS

(70 eV) 431 ( $M^+$ , 100), 249 (49), 147 (83). EI HRMS  $m/e$  calcd for  $[M]^+$   $C_{23}H_{19}F_5N_3$  431.1421, found 431.1455.

**4-(5-(4-(dimethylamino)phenyl)-1-phenyl-4,5-dihydro-1H-pyrazol-3-yl)benzotrile (4a)** M.p. 162-164°C.  $^1H$ -NMR ( $CDCl_3$ , 400 MHz)  $\delta$  2.92 (s, 6H), 3.10 (dd,  $J = 16.9, 6.9$  Hz, 1H), 3.76 (dd,  $J = 16.9, 12.2$  Hz, 1H), 5.30 (dd,  $J = 12.2, 6.9$  Hz, 1H), 6.67 (d,  $J = 8.2$  Hz, 2H), 6.82 (t,  $J = 7.1$  Hz, 1H), 7.10-7.22 (m, 6H), 7.63 (d,  $J = 8.0$  Hz, 2H), 7.76 (d,  $J = 8.0$  Hz, 2H).  $^{13}C$  NMR ( $CDCl_3$ , 100 MHz)  $\delta$  40.5, 42.9, 64.4, 110.6, 112.8, 113.6, 118.9, 119.6, 125.5, 126.4, 128.8, 129.1, 132.0, 137.2, 143.7, 144.0, 149.8. MS (70 eV) 366 ( $M^+$ , 100), 274 (9), 246 (13), 147 (53). EI HRMS  $m/e$  calcd for  $[M]^+$   $C_{24}H_{22}N_4$  366.1844, found 366.1835.

**4-(5-(4-(Dimethylamino)phenyl)-1-(3-fluorophenyl)-4,5-dihydro-1H-pyrazol-3-yl)-benzotrile (4c):** M.p. 149-151°C.  $^1H$ -NMR ( $CDCl_3$ , 400 MHz)  $\delta$  2.92 (s, 6H), 3.14 (dd,  $J = 17.2, 6.8$  Hz, 1H), 3.79 (dd,  $J = 17.2, 12.5$  Hz, 1H), 5.27 (d,  $J = 12.5, 6.8$  Hz, 1H), 6.49 (td,  $J = 8.4, 2.3$  Hz, 1H), 6.67 (d,  $J = 8.8$  Hz, 2H), 6.78 (dd,  $J = 8.3, 2.0$  Hz, 1H), 6.90 (dt,  $J = 6.9, 2.2$  Hz, 1H), 7.06-7.12 (m, 3H), 7.64 (d,  $J = 8.5$  Hz, 2H), 7.77 (d,  $J = 8.5$  Hz, 2H).  $^{13}C$  NMR ( $CDCl_3$ , 100 MHz)  $\delta$  40.5, 42.9, 64.3, 100.8 (d,  $J_{CF} = 26.8$  Hz), 106.0 (d,  $J_{CF} = 21.5$  Hz), 109.0 (d,  $J_{CF} = 2.2$  Hz), 111.0, 112.8, 118.7, 125.7, 126.3, 128.7, 129.8 (d,  $J_{CF} = 9.7$  Hz), 132.0, 136.7, 145.0, 145.2 (d,  $J_{CF} = 10.8$  Hz), 149.8, 163.2 (d,  $J_{CF} = 242.0$  Hz). MS (70 eV) 384 ( $M^+$ , 100), 274 (13), 174 (69). EI HRMS  $m/e$  calcd for  $[M]^+$   $C_{24}H_{21}FN_4$  384.1750, found 384.1747.

**4-(5-(4-(Dimethylamino)phenyl)-1-(4-fluorophenyl)-4,5-dihydro-1H-pyrazol-3-yl)-benzotrile (4d):** M.p. 178-180°C.  $^1H$ -NMR ( $CDCl_3$ , 400 MHz)  $\delta$  2.92 (s, 6H), 3.11 (dd,  $J = 17.0, 7.5$  Hz, 1H), 3.76 (dd,  $J = 17.0, 12.4$  Hz, 1H), 5.24 (dd,  $J = 12.4, 7.5$  Hz, 1H), 6.67 (d,  $J = 8.8$  Hz, 2H), 6.88 (t,  $J = 8.5$  Hz, 2H), 7.04 (dd,  $J = 9.2, 4.6$  Hz, 2H), 7.13 (d,  $J = 8.7$  Hz, 2H), 7.63 (d,  $J = 8.7$  Hz, 2H).  $^{13}C$  NMR ( $CDCl_3$ , 100 MHz)  $\delta$  40.5, 43.0, 65.0, 110.7, 112.7, 114.7 (d,  $J_{CF} = 7.4$  Hz), 115.3 (d,  $J_{CF} = 22.2$  Hz), 118.9, 125.5, 126.5, 128.7, 132.1, 137.0, 140.4 (d,  $J_{CF} = 2.0$  Hz), 144.2, 149.9, 156.9 (d,  $J_{CF} = 237.6$  Hz). MS (70 eV) 384 ( $M^+$ , 100), 274 (9), 146 (45). EI HRMS  $m/e$  calcd for  $[M]^+$   $C_{24}H_{21}FN_4$  384.1750, found 384.1760.

**4-(5-(4-(Dimethylamino)phenyl)-1-(2,5-difluorophenyl)-4,5-dihydro-1H-pyrazol-3-yl)-benzotrile (4f):** M.p. 198-200°C.  $^1H$ -NMR ( $CDCl_3$ , 400 MHz)  $\delta$  2.87 (s, 6H), 3.26 (dd,  $J = 17.0, 4.0$  Hz, 1H), 3.72 (dd,  $J = 16.8, 11.9$  Hz, 1H), 5.66 (ddd,  $J = 11.9, 3.8, 3.8$  Hz, 1H), 6.45-6.48 (m, 1H), 6.54 (d,  $J = 8.7$  Hz, 2H), 6.80 (ddd,  $J = 12.1, 9.0, 5.0$  Hz, 1H), 6.99 (d,  $J = 8.6$  Hz, 2H), 7.32 (ddd,  $J = 9.9, 6.6, 3.1$  Hz, 1H), 7.67 (d,  $J = 8.2$  Hz, 2H), 7.81 (d,  $J = 8.2$  Hz, 2H).  $^{13}C$  NMR ( $CDCl_3$ , 100 MHz)  $\delta$  40.4, 42.4, 66.0 (d,  $J_{CF} = 8.2$  Hz), 106.4 (dd,  $J_{CF} = 28.3, 3.7$  Hz), 107.5 (dd,  $J_{CF} = 24.9, 8.0$  Hz), 111.4, 112.2, 116.5 (dd,  $J_{CF} = 23.2, 10.1$  Hz), 118.7, 126.0, 126.7, 128.4, 132.1, 133.2 (t,  $J_{CF} = 11.0$  Hz), 136.6, 146.6, 146.9 (dd,  $J_{CF} = 239.1, 2.0$  Hz), 149.8, 158.8 (dd,  $J_{CF} = 240.2, 1.2$  Hz). MS (70 eV) 402 ( $M^+$ , 100), 274 (19), 201 (10), 146 (42). EI HRMS  $m/e$  calcd for  $[M]^+$   $C_{24}H_{20}F_2N_4$  402.1656, found 402.1670.

**4-(5-(4-(Dimethylamino)phenyl)-1-(2,3,5,6-tetrafluorophenyl)-4,5-dihydro-1H-pyrazol-3-yl)benzotrile (4i):** M.p. 180-181 °C.  $^1H$ -NMR ( $CDCl_3$ , 400 MHz)  $\delta$  2.90 (s, 6H), 3.28 (dd,  $J = 17.1, 7.2$  Hz, 1H), 3.71 (dd,  $J = 12.0, 17.1$  Hz, 1H), 5.52 (dd,  $J = 12.0, 7.2$  Hz, 1H), 6.59 (d,  $J = 8.8$  Hz, 2H), 6.68 (tt,  $J_{HF} = 9.8, 7.2$  Hz, 1H), 7.11 (d,  $J = 8.8$  Hz, 2H), 7.67 (d,  $J = 8.6$  Hz, 2H), 7.78 (d,  $J = 8.6$  Hz, 2H).  $^{13}C$  NMR ( $CDCl_3$ , 100 MHz)  $\delta$  40.3, 41.6, 67.5 (t,  $J_{CF} = 3.8$  Hz), 100.4 (t,  $J_{CF} = 22.6$  Hz), 111.7, 112.4, 118.8, 124.3, 126.1, 127.2, 127.3, 132.4, 136.7, 141.2 (CF), 146.2 (CF), 147.3, 150.4. MS (70 eV) 438 ( $M^+$ , 100), 274 (33), 147 (48). EI HRMS  $m/e$  calcd for  $[M]^+$   $C_{24}H_{18}F_4N_4$  438.1468, found 438.1449.

**4-(5-(4-(Dimethylamino)phenyl)-1-(pentafluorophenyl)-4,5-dihydro-1H-pyrazol-3-yl)-benzotrile (4j):** M.p. 59-61°C.  $^1H$ -NMR ( $CDCl_3$ , 400 MHz)  $\delta$  2.92 (s, 6H), 3.29 (dd,  $J = 16.9,$

8.0 Hz, 1H), 3.69 (dd,  $J = 16.9, 11.9$  Hz, 1H), 5.39 (dd,  $J = 11.4, 8.4$  Hz, 1H), 6.59 (d,  $J = 8.6$  Hz, 2H), 7.11 (d,  $J = 8.6$  Hz, 2H), 7.67 (d,  $J = 8.2$  Hz, 2H), 7.77 (d,  $J = 8.2$  Hz, 2H).  $^{13}\text{C}\{^{19}\text{F}, ^1\text{H}\}$  NMR (CDCl<sub>3</sub>, 100 MHz)  $\delta$  40.3, 41.7, 68.2, 111.7, 112.2, 118.7, 119.7, 126.0, 126.5, 127.4, 132.2, 136.4, 137.7 (CF), 138.0 (CF), 142.4 (CF), 147.6, 150.3. MS (70 eV) 456 (M<sup>+</sup>, 100), 274 (38), 147 (51). EI HRMS  $m/e$  calcd for [M]<sup>+</sup> C<sub>24</sub>H<sub>17</sub>F<sub>5</sub>N<sub>4</sub> 456.1373, found 456.1389.

**2,4,5-Trifluorophenylhydrazine (5):** To an ice-cold solution of 2,4,5-trifluoroaniline (1.01 g, 6.87 mmol) in 2.5 M aq. HCl (20 mL) was added dropwise with stirring to a solution of NaNO<sub>2</sub> (480 mg) in 20 mL of water. After stirring for 10 min, the resulting mixture was added to an ice-cold solution of SnCl<sub>2</sub>•H<sub>2</sub>O (6.73 g, 32.4 mmol) in conc. aq. HCl (40 mL). The reaction mixture was allowed to warm to room temperature and stirred for an additional 15 min. The precipitated product was filtered off, washed with diethyl ether, and dried in vacuo affording 1.36 g (6.84 mmol, 99%) of a colorless powder.  $^1\text{H}$ -NMR (DMSO-d<sub>6</sub>, 400 MHz)  $\delta$  3.42 (s, br, 1H), 7.41 (ddd,  $J_{\text{HF}} = 12.0, 7.9, 7.9$  Hz, 1H), 7.51 (ddd,  $J_{\text{HF}} = 10.6, 10.6, 7.4$  Hz, 1H), 10.44 (s, br, 3H). MS (70 eV) 162 (M<sup>+</sup>, 100), 146 (68), 119 (74). EI HRMS  $m/e$  calcd for [M]<sup>+</sup> C<sub>6</sub>H<sub>5</sub>F<sub>3</sub>N<sub>2</sub> 162.0405, found 162.0413.

**(E)-4-(3-Phenylprop-2-enoyl)benzointrile (6):** A solution of benzaldehyde (2.0g, 18.8 mmol), 4-acetyl benzointrile (2.76 g, 19.2 mmol), and piperidine (4.1 mL, 41.5 mmol) in abs. ethanol (20 mL) was heated at reflux temperature for 48 hours. After cooling to room temperature, the reaction mixture was diluted with sat. aqueous NH<sub>4</sub>Cl and extracted twice with dichloromethane. The combined organic extracts were dried (MgSO<sub>4</sub>) and concentrated under reduced pressure. The residue was purified on silicagel (FC, hexanes/EtOAc 10:1 → 4:1) yielding 1.8 g (7.7 mmol, 41%) of chalcone **6** as yellow solid. M.p. 110-112 °C.  $^1\text{H}$ -NMR (CDCl<sub>3</sub>, 400 MHz)  $\delta$  7.40-7.43 (m, 3H), 7.46 (d,  $J = 15.7$  Hz, 1H), 7.62-7.64 (m, 2H), 7.77 (d,  $J = 8.4$  Hz, 2H), 7.81 (d,  $J = 15.7$  Hz, 1H), 8.07 (d,  $J = 8.3$  Hz, 2H).  $^{13}\text{C}$  NMR (CDCl<sub>3</sub>, 100 MHz)  $\delta$  115.5, 117.7, 120.7, 128.3, 128.5, 128.7, 130.8, 132.1, 133.9, 140.9, 146.0, 188.5. MS (70 eV) 232 (M<sup>+</sup>, 100), 131 (26), 102 (19), 77 (14). EI HRMS  $m/e$  calcd for [M]<sup>+</sup> C<sub>16</sub>H<sub>11</sub>NO 233.0841, found 233.0833.

**(E)-4-(3-(4-(Dimethylamino)phenyl)prop-2-enoyl)benzointrile (7):** Synthesized from 4-dimethylamino benzaldehyde and 4-acetyl benzointrile following above procedure for chalcone (6). Yield: 71%.  $^1\text{H}$ -NMR (CDCl<sub>3</sub>, 400 MHz)  $\delta$  6.67 (d,  $J = 8.9$  Hz, 2H), 7.24 (d,  $J = 15.4$  Hz, 1H), 7.53 (d,  $J = 8.9$  Hz, 2H), 7.75 (d,  $J = 8.2$  Hz, 2H), 7.79 (d,  $J = 15.4$  Hz, 1H), 8.04 (d,  $J = 8.2$  Hz, 2H).  $^{13}\text{C}$  NMR (CDCl<sub>3</sub>, 100 MHz)  $\delta$  40.1, 111.6, 114.9, 115.4, 118.1, 121.8, 128.4, 130.6, 132.1, 142.3, 147.3, 152.1, 188.5.



## References

1. Hall, M. J., McDonnell, S. O., Killoran, J., O'Shea, D.F., *J. Org. Chem.* **2005**, *70*, 5571-5578.
2. Fahrni, C. J.; Yang, L. C.; VanDerveer, D. G. *J. Am. Chem. Soc.* **2003**, *125*, 3799-3812.

Complete Ref. 15:

Shao, Y.; Molnar, L. F.; Jung, Y.; Kussmann, J.; Ochsenfeld, C.; Brown, S. T.; Gilbert, A. T. B.; Slipchenko, L. V.; Levchenko, S. V.; O'Neill, D. P.; DiStasio, R. A.; Lochan, R. C.; Wang, T.; Beran, G. J. O.; Besley, N. A.; Herbert, J. M.; Lin, C. Y.; Van Voorhis, T.; Chien, S. H.; Sodt, A.; Steele, R. P.; Rassolov, V. A.; Maslen, P. E.; Korambath, P. P.; Adamson, R. D.; Austin, B.; Baker, J.; Byrd, E. F. C.; Dachsel, H.; Doerksen, R. J.; Dreuw, A.; Dunietz, B. D.; Dutoi, A. D.; Furlani, T. R.; Gwaltney, S. R.; Heyden, A.; Hirata, S.; Hsu, C. P.; Kedziora, G.; Khalliulin, R. Z.; Klunzinger, P.; Lee, A. M.; Lee, M. S.; Liang, W.; Lotan, I.; Nair, N.; Peters, B.; Proynov, E. I.; Pieniazek, P. A.; Rhee, Y. M.; Ritchie, J.; Rosta, E.; Sherrill, C. D.; Simmonett, A. C.; Subotnik, J. E.; Woodcock, H. L.; Zhang, W.; Bell, A. T.; Chakraborty, A. K.; Chipman, D. M.; Keil, F. J.; Warshel, A.; Hehre, W. J.; Schaefer, H. F.; Kong, J.; Krylov, A. I.; Gill, P. M. W.; Head-Gordon, M. *Phys. Chem. Chem. Phys.* **2006**, *8*, 3172-3191.

**Table S1-1:** Cartesian Atomic Coordinates for the Geometry Optimized Structure of Pyrazoline **1a** (B3LYP/6-31+G(d)).

| Atom | x/Å       | y/Å       | z/Å       |
|------|-----------|-----------|-----------|
| N    | 0.819275  | -0.936848 | -0.066155 |
| N    | -0.480063 | -0.651985 | 0.240023  |
| C    | 1.597589  | 0.011342  | 0.347219  |
| C    | 0.842325  | 1.110488  | 1.071480  |
| C    | -0.634648 | 0.631702  | 0.965489  |
| C    | -1.533663 | 1.630583  | 0.249828  |
| C    | -1.490322 | 1.767038  | -1.144050 |
| C    | -2.277324 | 2.724365  | -1.787194 |
| C    | -3.119954 | 3.557337  | -1.043895 |
| C    | -3.171991 | 3.424419  | 0.345724  |
| C    | -2.383532 | 2.464297  | 0.986968  |
| C    | -1.454780 | -1.649816 | 0.149518  |
| C    | -2.777778 | -1.395823 | 0.559405  |
| C    | -3.749114 | -2.393861 | 0.456651  |
| C    | -3.433072 | -3.653717 | -0.054926 |
| C    | -2.117189 | -3.904375 | -0.460806 |
| C    | -1.133113 | -2.923928 | -0.362384 |
| H    | -4.193682 | -4.425169 | -0.137928 |
| C    | 3.043533  | -0.005434 | 0.119177  |
| C    | 3.661186  | -1.075874 | -0.560902 |
| C    | 5.036199  | -1.082436 | -0.772700 |
| C    | 5.830953  | -0.022734 | -0.315173 |
| C    | 5.231823  | 1.042924  | 0.358572  |
| C    | 3.851436  | 1.052817  | 0.574588  |
| H    | 6.904475  | -0.030172 | -0.484705 |
| H    | 0.978925  | 2.087405  | 0.593912  |
| H    | 1.173536  | 1.207921  | 2.112264  |
| H    | -1.050305 | 0.432102  | 1.962343  |
| H    | -0.849236 | 1.109208  | -1.725823 |
| H    | -2.236935 | 2.816417  | -2.869665 |
| H    | -3.831545 | 4.060467  | 0.931226  |
| H    | -2.439326 | 2.356925  | 2.069015  |
| H    | -3.058159 | -0.419427 | 0.937983  |
| H    | -4.764681 | -2.172694 | 0.776258  |
| H    | -1.847618 | -4.880226 | -0.858295 |
| H    | -0.115296 | -3.129930 | -0.670209 |
| H    | 3.046044  | -1.894676 | -0.920068 |
| H    | 5.493812  | -1.917675 | -1.297045 |
| H    | 5.836952  | 1.871680  | 0.717523  |
| H    | 3.403704  | 1.894678  | 1.095711  |
| H    | -3.736534 | 4.299114  | -1.545115 |

**Table S1-2:** Cartesian Atomic Coordinates for the Geometry Optimized Structure of Pyrazoline **1b** (B3LYP/6-31+G(d)).

| Atom | x/Å       | y/Å       | z/Å       |
|------|-----------|-----------|-----------|
| N    | 0.921905  | 0.984284  | -0.168533 |
| N    | -0.331661 | 0.678267  | -0.628854 |
| C    | 1.749450  | 0.033455  | -0.461603 |
| C    | 1.077991  | -1.120051 | -1.182671 |
| C    | -0.424703 | -0.735639 | -1.109109 |
| C    | -1.245758 | -1.630993 | -0.194143 |
| C    | -1.019445 | -1.666660 | 1.190612  |
| C    | -1.753158 | -2.528403 | 2.007469  |
| C    | -2.724060 | -3.368919 | 1.452242  |
| C    | -2.959135 | -3.337279 | 0.076209  |
| C    | -2.225454 | -2.469780 | -0.738808 |
| C    | -1.407455 | 1.457269  | -0.186632 |
| C    | -2.650918 | 1.424129  | -0.837940 |
| C    | -3.735311 | 2.188499  | -0.437782 |
| C    | -3.596165 | 3.060423  | 0.645154  |
| C    | -2.364466 | 3.139205  | 1.300853  |
| C    | -1.289433 | 2.347073  | 0.898958  |
| H    | -4.436150 | 3.670611  | 0.963671  |
| C    | 3.179939  | 0.117685  | -0.160413 |
| C    | 3.726241  | 1.247703  | 0.482870  |
| C    | 5.088898  | 1.317826  | 0.755915  |
| C    | 5.941378  | 0.266018  | 0.393772  |
| C    | 5.412945  | -0.857388 | -0.244207 |
| C    | 4.045270  | -0.932412 | -0.518831 |
| H    | 7.005764  | 0.326198  | 0.605393  |
| H    | 1.272008  | -2.086352 | -0.704888 |
| H    | 1.428796  | -1.190195 | -2.220280 |
| H    | -0.875672 | -0.743191 | -2.102471 |
| H    | -0.272206 | -1.012986 | 1.634097  |
| H    | -1.569664 | -2.542286 | 3.078985  |
| H    | -3.717598 | -3.980004 | -0.363662 |
| H    | -2.421079 | -2.436821 | -1.808395 |
| F    | -2.805186 | 0.621727  | -1.934345 |
| H    | -4.665601 | 2.101802  | -0.990849 |
| H    | -2.237299 | 3.813993  | 2.143240  |
| H    | -0.337141 | 2.406522  | 1.412425  |
| H    | 3.066570  | 2.064130  | 0.759245  |
| H    | 5.492724  | 2.198096  | 1.249796  |
| H    | 6.064321  | -1.678857 | -0.531661 |
| H    | 3.651811  | -1.815005 | -1.015309 |
| H    | -3.294514 | -4.039626 | 2.089983  |

**Table S1-3:** Cartesian Atomic Coordinates for the Geometry Optimized Structure of Pyrazoline **1c** (B3LYP/6-31+G(d)).

| Atom | x/Å       | y/Å       | z/Å       |
|------|-----------|-----------|-----------|
| N    | 0.994097  | 0.937503  | 0.069349  |
| N    | -0.280970 | 0.536175  | -0.214546 |
| C    | 1.844054  | 0.059506  | -0.356718 |
| C    | 1.174671  | -1.108628 | -1.058084 |
| C    | -0.336094 | -0.756699 | -0.937105 |
| C    | -1.141091 | -1.825486 | -0.211144 |
| C    | -1.085468 | -1.948065 | 1.183609  |
| C    | -1.783750 | -2.968284 | 1.832510  |
| C    | -2.548495 | -3.878421 | 1.095666  |
| C    | -2.611959 | -3.760272 | -0.294784 |
| C    | -1.911862 | -2.737714 | -0.942196 |
| C    | -1.340240 | 1.429933  | -0.072033 |
| C    | -2.635190 | 1.063872  | -0.487767 |
| C    | -3.670826 | 1.971904  | -0.314534 |
| C    | -3.506341 | 3.227975  | 0.250035  |
| C    | -2.211485 | 3.576541  | 0.653475  |
| C    | -1.137370 | 2.704647  | 0.500219  |
| H    | -4.353597 | 3.894810  | 0.367374  |
| C    | 3.286869  | 0.199015  | -0.152302 |
| C    | 3.824206  | 1.318839  | 0.515748  |
| C    | 5.196658  | 1.435540  | 0.710940  |
| C    | 6.068205  | 0.441516  | 0.245798  |
| C    | 5.548647  | -0.670909 | -0.418325 |
| C    | 4.171195  | -0.791704 | -0.616718 |
| H    | 7.139526  | 0.536761  | 0.401961  |
| H    | 1.398573  | -2.062910 | -0.568158 |
| H    | 1.500368  | -1.193074 | -2.101398 |
| H    | -0.777033 | -0.592510 | -1.929679 |
| H    | -0.506999 | -1.232040 | 1.762056  |
| H    | -1.735595 | -3.049030 | 2.915570  |
| H    | -3.211911 | -4.455857 | -0.876263 |
| H    | -1.976764 | -2.644189 | -2.024992 |
| H    | -2.855526 | 0.094335  | -0.916370 |
| F    | -4.915918 | 1.592992  | -0.720144 |
| H    | -2.037741 | 4.552891  | 1.098603  |
| H    | -0.141879 | 2.992231  | 0.812916  |
| H    | 3.149908  | 2.087789  | 0.879035  |
| H    | 5.592758  | 2.305766  | 1.228381  |
| H    | 6.213549  | -1.450175 | -0.781941 |
| H    | 3.784149  | -1.667828 | -1.129943 |
| H    | -3.096412 | -4.668284 | 1.602796  |

**Table S1-4:** Cartesian Atomic Coordinates for the Geometry Optimized Structure of Pyrazoline **1d** (B3LYP/6-31+G(d)).

| Atom | x/Å       | y/Å       | z/Å       |
|------|-----------|-----------|-----------|
| N    | 0.866484  | 0.899794  | 0.114003  |
| N    | -0.356356 | 0.346744  | -0.155797 |
| C    | 1.813191  | 0.127221  | -0.310390 |
| C    | 1.287911  | -1.114169 | -1.005615 |
| C    | -0.254572 | -0.927725 | -0.907394 |
| C    | -0.949660 | -2.101053 | -0.230995 |
| C    | -1.041537 | -2.187967 | 1.163969  |
| C    | -1.633029 | -3.301095 | 1.765800  |
| C    | -2.134855 | -4.343544 | 0.980831  |
| C    | -2.045800 | -4.264252 | -0.411659 |
| C    | -1.459338 | -3.146899 | -1.011955 |
| C    | -1.496179 | 1.161469  | -0.125536 |
| C    | -2.757714 | 0.639192  | -0.469507 |
| C    | -3.897596 | 1.446013  | -0.425405 |
| C    | -3.773434 | 2.770716  | -0.035078 |
| C    | -2.543101 | 3.315709  | 0.311934  |
| C    | -1.404380 | 2.513831  | 0.263480  |
| F    | -4.886875 | 3.558836  | 0.011586  |
| C    | 3.229679  | 0.432487  | -0.099269 |
| C    | 3.629816  | 1.585875  | 0.606702  |
| C    | 4.978576  | 1.861687  | 0.806136  |
| C    | 5.962118  | 0.996609  | 0.307367  |
| C    | 5.578844  | -0.147831 | -0.394036 |
| C    | 4.225588  | -0.428705 | -0.595838 |
| H    | 7.014852  | 1.214302  | 0.467217  |
| H    | 1.612350  | -2.030027 | -0.498967 |
| H    | 1.632533  | -1.177314 | -2.044200 |
| H    | -0.689699 | -0.785453 | -1.906559 |
| H    | -0.663837 | -1.371954 | 1.774074  |
| H    | -1.707261 | -3.352122 | 2.849143  |
| H    | -2.438009 | -5.066898 | -1.031058 |
| H    | -1.400469 | -3.086109 | -2.097446 |
| H    | -2.866928 | -0.402091 | -0.748688 |
| H    | -4.872792 | 1.045889  | -0.684818 |
| H    | -2.477096 | 4.358024  | 0.608418  |
| H    | -0.437779 | 2.926746  | 0.523232  |
| H    | 2.867870  | 2.254046  | 0.995236  |
| H    | 5.268283  | 2.754163  | 1.355271  |
| H    | 6.332612  | -0.827557 | -0.783568 |
| H    | 3.945308  | -1.326037 | -1.140783 |
| H    | -2.596128 | -5.208300 | 1.450528  |

**Table S1-5:** Cartesian Atomic Coordinates for the Geometry Optimized Structure of Pyrazoline **1e** (B3LYP/6-31+G(d)).

| Atom | x/Å       | y/Å       | z/Å       |
|------|-----------|-----------|-----------|
| N    | -0.998623 | -0.961121 | -0.265873 |
| N    | 0.183516  | -0.460041 | -0.750557 |
| C    | -1.961474 | -0.127801 | -0.497034 |
| C    | -1.484055 | 1.130429  | -1.197416 |
| C    | 0.059827  | 0.978390  | -1.142925 |
| C    | 0.738323  | 1.931649  | -0.170289 |
| C    | 0.528806  | 1.831498  | 1.213774  |
| C    | 1.116435  | 2.745627  | 2.089458  |
| C    | 1.922552  | 3.775928  | 1.593579  |
| C    | 2.143680  | 3.878517  | 0.218572  |
| C    | 1.556903  | 2.958517  | -0.655850 |
| C    | 1.373492  | -1.080751 | -0.347299 |
| C    | 2.584375  | -0.839800 | -1.016663 |
| C    | 3.782214  | -1.443786 | -0.663646 |
| C    | 3.763184  | -2.351962 | 0.387127  |
| C    | 2.595334  | -2.653879 | 1.074476  |
| C    | 1.412636  | -2.010614 | 0.708630  |
| F    | 4.926065  | -2.964025 | 0.740710  |
| C    | -3.353804 | -0.422041 | -0.151444 |
| C    | -3.702195 | -1.606956 | 0.529651  |
| C    | -5.029787 | -1.876478 | 0.847056  |
| C    | -6.042308 | -0.975274 | 0.491580  |
| C    | -5.710326 | 0.200443  | -0.184027 |
| C    | -4.378286 | 0.476217  | -0.501799 |
| H    | -7.078617 | -1.191478 | 0.737585  |
| H    | -1.820306 | 2.045598  | -0.700079 |
| H    | -1.848443 | 1.161930  | -2.232532 |
| H    | 0.497080  | 1.115192  | -2.132830 |
| H    | -0.090856 | 1.030962  | 1.610452  |
| H    | 0.946565  | 2.651954  | 3.159106  |
| H    | 2.777432  | 4.669590  | -0.174660 |
| H    | 1.742271  | 3.036403  | -1.725102 |
| F    | 2.600002  | 0.014448  | -2.078953 |
| H    | 4.693214  | -1.221616 | -1.208072 |
| H    | 2.614258  | -3.370230 | 1.889503  |
| H    | 0.490420  | -2.227752 | 1.233750  |
| H    | -2.918882 | -2.308063 | 0.799731  |
| H    | -5.280188 | -2.794139 | 1.373616  |
| H    | -6.487182 | 0.906089  | -0.467347 |
| H    | -4.137354 | 1.393367  | -1.032301 |
| H    | 2.378577  | 4.489282  | 2.275328  |

**Table S1-6:** Cartesian Atomic Coordinates for the Geometry Optimized Structure of Pyrazoline **1f** (B3LYP/6-31+G(d)).

| Atom | x/Å       | y/Å       | z/Å       |
|------|-----------|-----------|-----------|
| N    | -0.918478 | -0.863256 | -0.361586 |
| N    | 0.279826  | -0.378135 | -0.825097 |
| C    | -1.849097 | 0.017838  | -0.540353 |
| C    | -1.327464 | 1.290950  | -1.180311 |
| C    | 0.209358  | 1.085410  | -1.125741 |
| C    | 0.910088  | 1.939572  | -0.078909 |
| C    | 0.714646  | 1.712455  | 1.291491  |
| C    | 1.327079  | 2.531107  | 2.241670  |
| C    | 2.144920  | 3.590293  | 1.834397  |
| C    | 2.352344  | 3.818497  | 0.472638  |
| C    | 1.739950  | 2.994437  | -0.477020 |
| C    | 1.442423  | -1.083177 | -0.510319 |
| C    | 2.665635  | -0.811870 | -1.149941 |
| C    | 3.832143  | -1.501842 | -0.864187 |
| C    | 3.819892  | -2.536534 | 0.075255  |
| C    | 2.608183  | -2.823965 | 0.690868  |
| C    | 1.436301  | -2.130316 | 0.431535  |
| H    | 4.712506  | -3.103073 | 0.316117  |
| C    | -3.250114 | -0.238920 | -0.200250 |
| C    | -3.638723 | -1.433589 | 0.440205  |
| C    | -4.975237 | -1.667582 | 0.748330  |
| C    | -5.955462 | -0.720532 | 0.423214  |
| C    | -5.582878 | 0.465856  | -0.211397 |
| C    | -4.241844 | 0.706340  | -0.518977 |
| H    | -6.998826 | -0.909603 | 0.661681  |
| H    | -1.637854 | 2.194384  | -0.646342 |
| H    | -1.685761 | 1.376158  | -2.214730 |
| H    | 0.661845  | 1.273328  | -2.099673 |
| H    | 0.089567  | 0.885008  | 1.617540  |
| H    | 1.167636  | 2.340376  | 3.299901  |
| H    | 2.996085  | 4.631835  | 0.147052  |
| H    | 1.917100  | 3.168398  | -1.536175 |
| F    | 2.713556  | 0.152928  | -2.117001 |
| H    | 4.739744  | -1.233693 | -1.395734 |
| F    | 2.565682  | -3.827720 | 1.610245  |
| H    | 0.520247  | -2.391640 | 0.945311  |
| H    | -2.879775 | -2.169027 | 0.687511  |
| H    | -5.258145 | -2.592800 | 1.244092  |
| H    | -6.334693 | 1.206894  | -0.470517 |
| H    | -3.967218 | 1.632463  | -1.016531 |
| H    | 2.622102  | 4.227271  | 2.574897  |

**Table S1-7:** Cartesian Atomic Coordinates for the Geometry Optimized Structure of Pyrazoline **1g** (B3LYP/6-31+G(d)).

| Atom | x/Å       | y/Å       | z/Å       |
|------|-----------|-----------|-----------|
| N    | 0.990427  | 0.813219  | 0.051422  |
| N    | -0.240432 | 0.272532  | -0.218399 |
| C    | 1.924048  | 0.016637  | -0.355296 |
| C    | 1.381965  | -1.228011 | -1.031813 |
| C    | -0.158010 | -1.035113 | -0.913868 |
| C    | -0.841735 | -2.172501 | -0.168998 |
| C    | -0.863062 | -2.216134 | 1.231367  |
| C    | -1.433955 | -3.303859 | 1.895573  |
| C    | -1.987736 | -4.362381 | 1.169188  |
| C    | -1.973269 | -4.323876 | -0.227743 |
| C    | -1.405573 | -3.232375 | -0.890736 |
| C    | -1.371337 | 1.078688  | -0.160498 |
| C    | -2.634038 | 0.556057  | -0.509888 |
| C    | -3.740432 | 1.390278  | -0.430560 |
| C    | -3.686600 | 2.717312  | -0.025790 |
| C    | -2.419830 | 3.188306  | 0.308472  |
| C    | -1.267280 | 2.424324  | 0.253328  |
| H    | -4.569717 | 3.341839  | 0.028761  |
| C    | 3.345606  | 0.307224  | -0.154516 |
| C    | 3.762443  | 1.474518  | 0.517436  |
| C    | 5.115481  | 1.736150  | 0.706844  |
| C    | 6.084819  | 0.842738  | 0.231194  |
| C    | 5.684380  | -0.315614 | -0.437042 |
| C    | 4.326941  | -0.582258 | -0.628805 |
| H    | 7.140833  | 1.049908  | 0.383025  |
| H    | 1.709489  | -2.142431 | -0.525707 |
| H    | 1.712797  | -1.295682 | -2.074750 |
| H    | -0.611759 | -0.934643 | -1.908787 |
| H    | -0.444271 | -1.389567 | 1.799413  |
| H    | -1.450504 | -3.322309 | 2.982339  |
| H    | -2.409108 | -5.137562 | -0.801667 |
| H    | -1.406168 | -3.202803 | -1.979205 |
| H    | -2.775275 | -0.475381 | -0.805517 |
| F    | -4.951265 | 0.872428  | -0.768218 |
| F    | -2.309730 | 4.483290  | 0.705866  |
| H    | -0.311285 | 2.855231  | 0.517229  |
| H    | 3.011136  | 2.165073  | 0.886982  |
| H    | 5.419488  | 2.639750  | 1.229136  |
| H    | 6.427601  | -1.016616 | -0.808374 |
| H    | 4.032129  | -1.490204 | -1.147865 |
| H    | -2.433360 | -5.206986 | 1.687900  |



**Table S1-8:** Cartesian Atomic Coordinates for the Geometry Optimized Structure of Pyrazoline **1h** (B3LYP/6-31+G(d)).

| Atom | x/Å       | y/Å       | z/Å       |
|------|-----------|-----------|-----------|
| N    | -1.018116 | -0.861597 | -0.400328 |
| N    | 0.101811  | -0.211361 | -0.862228 |
| C    | -2.060598 | -0.112599 | -0.562991 |
| C    | -1.720015 | 1.224257  | -1.193471 |
| C    | -0.169353 | 1.233266  | -1.136589 |
| C    | 0.396895  | 2.166014  | -0.074841 |
| C    | 0.247533  | 1.889480  | 1.292556  |
| C    | 0.722334  | 2.783561  | 2.253511  |
| C    | 1.355733  | 3.967374  | 1.861519  |
| C    | 1.515157  | 4.247702  | 0.502982  |
| C    | 1.039548  | 3.349686  | -0.457730 |
| C    | 1.349319  | -0.755748 | -0.549709 |
| C    | 2.529927  | -0.308731 | -1.167680 |
| C    | 3.778326  | -0.847748 | -0.893840 |
| C    | 3.871228  | -1.897434 | 0.010352  |
| C    | 2.719181  | -2.380819 | 0.622990  |
| C    | 1.478455  | -1.821093 | 0.362205  |
| F    | 5.070718  | -2.457232 | 0.283000  |
| C    | -3.409220 | -0.562374 | -0.209247 |
| C    | -3.621021 | -1.806617 | 0.419945  |
| C    | -4.906825 | -2.222995 | 0.750783  |
| C    | -6.012356 | -1.412024 | 0.461876  |
| C    | -5.815822 | -0.178881 | -0.162007 |
| C    | -4.526227 | 0.244025  | -0.493148 |
| H    | -7.015265 | -1.741299 | 0.720196  |
| H    | -2.150334 | 2.072994  | -0.653987 |
| H    | -2.083867 | 1.266591  | -2.228735 |
| H    | 0.256335  | 1.498472  | -2.105158 |
| H    | -0.236782 | 0.969403  | 1.609250  |
| H    | 0.599317  | 2.554782  | 3.309015  |
| H    | 2.016142  | 5.159553  | 0.187954  |
| H    | 1.178985  | 3.567694  | -1.514416 |
| F    | 2.464605  | 0.680693  | -2.102721 |
| H    | 4.660679  | -0.467288 | -1.396455 |
| F    | 2.816405  | -3.406636 | 1.498795  |
| H    | 0.600548  | -2.215217 | 0.857698  |
| H    | -2.766143 | -2.436794 | 0.643793  |
| H    | -5.050355 | -3.184275 | 1.237900  |
| H    | -6.665758 | 0.457746  | -0.394392 |
| H    | -4.394093 | 1.205110  | -0.982395 |
| H    | 1.725962  | 4.661978  | 2.611165  |

**Table S1-9:** Cartesian Atomic Coordinates for the Geometry Optimized Structure of Pyrazoline **1i** (B3LYP/6-31+G(d)).

| Atom | x/Å       | y/Å       | z/Å       |
|------|-----------|-----------|-----------|
| N    | -1.126653 | -0.807789 | -0.371697 |
| N    | 0.065378  | -0.240701 | -0.757179 |
| C    | -2.091710 | 0.023730  | -0.589965 |
| C    | -1.614797 | 1.335534  | -1.187360 |
| C    | -0.070880 | 1.212223  | -1.093997 |
| C    | 0.572178  | 2.116669  | -0.054183 |
| C    | 0.302517  | 1.952115  | 1.313493  |
| C    | 0.876259  | 2.805581  | 2.256661  |
| C    | 1.728643  | 3.836593  | 1.846012  |
| C    | 2.007767  | 4.003238  | 0.488355  |
| C    | 1.434255  | 3.144109  | -0.455120 |
| C    | 1.261661  | -0.859034 | -0.409498 |
| C    | 2.389716  | -0.727238 | -1.241986 |
| C    | 3.601400  | -1.331219 | -0.933330 |
| C    | 3.749674  | -2.119056 | 0.200679  |
| C    | 2.643001  | -2.261946 | 1.027833  |
| C    | 1.430507  | -1.637002 | 0.753850  |
| H    | 4.692611  | -2.599777 | 0.433637  |
| C    | -3.490555 | -0.319398 | -0.319524 |
| C    | -3.830305 | -1.536755 | 0.305531  |
| C    | -5.161554 | -1.853452 | 0.557514  |
| C    | -6.183636 | -0.967414 | 0.192098  |
| C    | -5.858925 | 0.241062  | -0.426838 |
| C    | -4.523566 | 0.564156  | -0.679910 |
| H    | -7.222395 | -1.218765 | 0.389478  |
| H    | -1.985488 | 2.208940  | -0.641990 |
| H    | -1.949251 | 1.427982  | -2.228500 |
| H    | 0.395797  | 1.396548  | -2.063514 |
| H    | -0.348678 | 1.146158  | 1.643900  |
| H    | 0.661320  | 2.663204  | 3.312654  |
| H    | 2.676147  | 4.795832  | 0.161521  |
| H    | 1.660880  | 3.273939  | -1.511437 |
| F    | 2.287746  | -0.018497 | -2.389250 |
| F    | 4.642417  | -1.164882 | -1.776159 |
| F    | 2.748876  | -2.992028 | 2.157746  |
| F    | 0.434215  | -1.759852 | 1.648977  |
| H    | -3.037350 | -2.221484 | 0.589189  |
| H    | -5.406205 | -2.794730 | 1.043302  |
| H    | -6.644016 | 0.935402  | -0.715444 |
| H    | -4.288123 | 1.507228  | -1.165879 |
| H    | 2.174499  | 4.501322  | 2.581498  |

**Table S1-10:** Cartesian Atomic Coordinates for the Geometry Optimized Structure of Pyrazoline **1j** (B3LYP/6-31+G(d)).

| Atom | x/Å       | y/Å       | z/Å       |
|------|-----------|-----------|-----------|
| N    | -1.259214 | -0.820961 | -0.411812 |
| N    | -0.127422 | -0.140191 | -0.799713 |
| C    | -2.297793 | -0.075386 | -0.602143 |
| C    | -1.946728 | 1.284726  | -1.180852 |
| C    | -0.397798 | 1.301572  | -1.099018 |
| C    | 0.165071  | 2.242722  | -0.045584 |
| C    | -0.070449 | 2.027397  | 1.321253  |
| C    | 0.420538  | 2.920939  | 2.274134  |
| C    | 1.155788  | 4.042480  | 1.874931  |
| C    | 1.400175  | 4.261262  | 0.518078  |
| C    | 0.908346  | 3.363456  | -0.435207 |
| C    | 1.123730  | -0.650132 | -0.463383 |
| C    | 2.225496  | -0.425714 | -1.309035 |
| C    | 3.499123  | -0.901742 | -1.020482 |
| C    | 3.711788  | -1.663826 | 0.125124  |
| C    | 2.641066  | -1.918637 | 0.977656  |
| C    | 1.377646  | -1.402675 | 0.699985  |
| F    | 4.933910  | -2.138418 | 0.407956  |
| C    | -3.657036 | -0.541879 | -0.314075 |
| C    | -3.882137 | -1.799838 | 0.281775  |
| C    | -5.177099 | -2.229735 | 0.556089  |
| C    | -6.276317 | -1.418964 | 0.243227  |
| C    | -6.065365 | -0.171877 | -0.347321 |
| C    | -4.767052 | 0.264339  | -0.622978 |
| H    | -7.285941 | -1.758537 | 0.458932  |
| H    | -2.390395 | 2.112752  | -0.619586 |
| H    | -2.294468 | 1.362875  | -2.218917 |
| H    | 0.042955  | 1.550278  | -2.066707 |
| H    | -0.631534 | 1.153898  | 1.644301  |
| H    | 0.231867  | 2.739589  | 3.329125  |
| H    | 1.977637  | 5.125104  | 0.198806  |
| H    | 1.106619  | 3.536217  | -1.491081 |
| F    | 2.052390  | 0.264659  | -2.455658 |
| F    | 4.516153  | -0.654045 | -1.860765 |
| F    | 2.839432  | -2.627845 | 2.099508  |
| F    | 0.409406  | -1.617421 | 1.605502  |
| H    | -3.030308 | -2.426487 | 0.526610  |
| H    | -5.332559 | -3.200959 | 1.019176  |
| H    | -6.910230 | 0.465599  | -0.595193 |
| H    | -4.622124 | 1.236938  | -1.085111 |
| H    | 1.537342  | 4.737489  | 2.618388  |

**Table S1-11:** Cartesian Atomic Coordinates for the Geometry Optimized Structure of Pyrazoline **2a** (B3LYP/6-31+G(d)).

| Atom | x/Å       | y/Å       | z/Å       |
|------|-----------|-----------|-----------|
| N    | 0.263932  | -0.930275 | 0.023746  |
| N    | -1.034672 | -0.655013 | 0.298666  |
| C    | 1.029799  | 0.029158  | 0.443599  |
| C    | 0.252358  | 1.130071  | 1.139873  |
| C    | -1.219048 | 0.642662  | 0.996338  |
| C    | -2.101100 | 1.623679  | 0.236887  |
| C    | -2.021684 | 1.736419  | -1.157535 |
| C    | -2.797173 | 2.677899  | -1.837198 |
| C    | -3.662644 | 3.518491  | -1.130008 |
| C    | -3.750030 | 3.409352  | 0.259855  |
| C    | -2.973846 | 2.464937  | 0.937889  |
| C    | -2.012900 | -1.647909 | 0.157310  |
| C    | -3.345892 | -1.391817 | 0.527163  |
| C    | -4.317477 | -2.383625 | 0.378073  |
| C    | -3.988698 | -3.637323 | -0.139930 |
| C    | -2.661450 | -3.889724 | -0.505000 |
| C    | -1.677615 | -2.914945 | -0.360714 |
| H    | -4.749249 | -4.403817 | -0.259368 |
| C    | 2.474913  | 0.009137  | 0.245863  |
| C    | 3.108507  | -1.069716 | -0.409661 |
| C    | 4.482022  | -1.083238 | -0.595308 |
| C    | 5.272214  | -0.011578 | -0.130477 |
| C    | 4.654388  | 1.067087  | 0.522887  |
| C    | 3.274777  | 1.073383  | 0.707067  |
| H    | 0.394817  | 2.104676  | 0.659464  |
| H    | 0.553679  | 1.236028  | 2.188945  |
| H    | -1.664238 | 0.454721  | 1.981999  |
| H    | -1.362490 | 1.073725  | -1.713040 |
| H    | -2.728964 | 2.751798  | -2.919541 |
| H    | -4.427203 | 4.052191  | 0.816849  |
| H    | -3.057084 | 2.375832  | 2.019759  |
| H    | -3.634125 | -0.419978 | 0.910922  |
| H    | -5.342273 | -2.162554 | 0.665855  |
| H    | -2.383285 | -4.861238 | -0.906473 |
| H    | -0.650875 | -3.122158 | -0.636342 |
| H    | 2.503308  | -1.893437 | -0.772810 |
| H    | 4.957010  | -1.919465 | -1.099166 |
| H    | 5.257496  | 1.895193  | 0.882289  |
| H    | 2.817849  | 1.920210  | 1.210293  |
| H    | -4.269388 | 4.248483  | -1.659557 |
| C    | 6.691438  | -0.021880 | -0.325255 |
| N    | 7.845006  | -0.030901 | -0.485323 |

**Table S1-12:** Cartesian Atomic Coordinates for the Geometry Optimized Structure of Pyrazoline **2b** (B3LYP/6-31+G(d)).

| Atom | x/Å       | y/Å       | z/Å       |
|------|-----------|-----------|-----------|
| N    | 0.395623  | -0.925118 | 0.228637  |
| N    | -0.876698 | -0.650298 | 0.622712  |
| C    | 1.188500  | 0.047901  | 0.555100  |
| C    | 0.459008  | 1.184661  | 1.244230  |
| C    | -1.029123 | 0.756718  | 1.114785  |
| C    | -1.847397 | 1.630523  | 0.177379  |
| C    | -1.559667 | 1.696827  | -1.194758 |
| C    | -2.292839 | 2.538139  | -2.032746 |
| C    | -3.323913 | 3.326711  | -1.510650 |
| C    | -3.618881 | 3.265105  | -0.147203 |
| C    | -2.885578 | 2.417798  | 0.689233  |
| C    | -1.912998 | -1.473124 | 0.158659  |
| C    | -3.163769 | -1.501972 | 0.794180  |
| C    | -4.205064 | -2.314187 | 0.373257  |
| C    | -4.009129 | -3.168055 | -0.714827 |
| C    | -2.767779 | -3.181863 | -1.357110 |
| C    | -1.737859 | -2.342825 | -0.934321 |
| H    | -4.814222 | -3.815741 | -1.048731 |
| C    | 2.626045  | -0.014476 | 0.310602  |
| C    | 3.215061  | -1.142861 | -0.301257 |
| C    | 4.581660  | -1.199134 | -0.526354 |
| C    | 5.409283  | -0.123532 | -0.142800 |
| C    | 4.836024  | 1.003767  | 0.467414  |
| C    | 3.462813  | 1.053730  | 0.689519  |
| H    | 0.641289  | 2.154342  | 0.768617  |
| H    | 0.767314  | 1.270163  | 2.294061  |
| H    | -1.514692 | 0.737882  | 2.091422  |
| H    | -0.763940 | 1.083732  | -1.611483 |
| H    | -2.063082 | 2.576627  | -3.094565 |
| H    | -4.423092 | 3.868575  | 0.265706  |
| H    | -3.125357 | 2.361705  | 1.748761  |
| F    | -3.367678 | -0.717678 | 1.893848  |
| H    | -5.145396 | -2.277990 | 0.914600  |
| H    | -2.598812 | -3.841180 | -2.204074 |
| H    | -0.778088 | -2.351035 | -1.437394 |
| H    | 2.581090  | -1.973229 | -0.593608 |
| H    | 5.023127  | -2.073207 | -0.995280 |
| H    | 5.469064  | 1.833575  | 0.766399  |
| H    | 3.040204  | 1.934705  | 1.162960  |
| H    | -3.893808 | 3.981643  | -2.164907 |
| C    | 6.822325  | -0.183091 | -0.371576 |
| N    | 7.970671  | -0.234874 | -0.558727 |

**Table S1-13:** Cartesian Atomic Coordinates for the Geometry Optimized Structure of Pyrazoline **2c** (B3LYP/6-31+G(d)).

| Atom | x/Å       | y/Å       | z/Å       |
|------|-----------|-----------|-----------|
| N    | 0.480498  | -0.869483 | -0.000447 |
| N    | -0.806712 | -0.522750 | 0.257142  |
| C    | 1.288820  | 0.048137  | 0.431044  |
| C    | 0.560884  | 1.193327  | 1.109855  |
| C    | -0.931657 | 0.778817  | 0.960869  |
| C    | -1.765800 | 1.802886  | 0.204765  |
| C    | -1.679759 | 1.918723  | -1.189049 |
| C    | -2.412405 | 2.896900  | -1.864214 |
| C    | -3.241086 | 3.771204  | -1.153794 |
| C    | -3.334175 | 3.659824  | 0.235425  |
| C    | -2.600415 | 2.679112  | 0.909332  |
| C    | -1.833589 | -1.453116 | 0.081567  |
| C    | -3.149068 | -1.128504 | 0.460717  |
| C    | -4.149317 | -2.070651 | 0.262376  |
| C    | -3.926209 | -3.321289 | -0.294093 |
| C    | -2.610378 | -3.627601 | -0.661348 |
| C    | -1.570633 | -2.719651 | -0.481552 |
| H    | -4.746302 | -4.017461 | -0.432320 |
| C    | 2.734382  | -0.045305 | 0.252805  |
| C    | 3.321798  | -1.156502 | -0.390641 |
| C    | 4.695193  | -1.236395 | -0.560769 |
| C    | 5.530490  | -0.202197 | -0.090460 |
| C    | 4.958501  | 0.907845  | 0.551770  |
| C    | 3.578718  | 0.980772  | 0.719978  |
| H    | 0.753944  | 2.153124  | 0.617414  |
| H    | 0.860449  | 1.298055  | 2.159268  |
| H    | -1.387012 | 0.605719  | 1.944824  |
| H    | -1.051032 | 1.230131  | -1.748279 |
| H    | -2.340501 | 2.972569  | -2.946194 |
| H    | -3.983805 | 4.327951  | 0.795208  |
| H    | -2.688758 | 2.589403  | 1.990706  |
| H    | -3.412703 | -0.166084 | 0.880189  |
| F    | -5.414772 | -1.732284 | 0.634203  |
| H    | -2.392231 | -4.598709 | -1.097908 |
| H    | -0.557791 | -2.975595 | -0.764859 |
| H    | 2.681923  | -1.952105 | -0.757101 |
| H    | 5.135613  | -2.096212 | -1.056230 |
| H    | 5.596621  | 1.707742  | 0.914446  |
| H    | 3.156290  | 1.850438  | 1.214363  |
| H    | -3.815725 | 4.528398  | -1.680739 |
| C    | 6.949897  | -0.283956 | -0.267898 |
| N    | 8.103184  | -0.353637 | -0.413943 |

**Table S1-14:** Cartesian Atomic Coordinates for the Geometry Optimized Structure of Pyrazoline **2d** (B3LYP/6-31+G(d)).

| Atom | x/Å       | y/Å       | z/Å       |
|------|-----------|-----------|-----------|
| N    | 0.397538  | -0.772582 | 0.012564  |
| N    | -0.862791 | -0.340833 | 0.268184  |
| C    | 1.267554  | 0.092773  | 0.433130  |
| C    | 0.619386  | 1.285784  | 1.110701  |
| C    | -0.898113 | 0.964253  | 0.975423  |
| C    | -1.670400 | 2.043504  | 0.230478  |
| C    | -1.615407 | 2.139764  | -1.166463 |
| C    | -2.279504 | 3.173308  | -1.830241 |
| C    | -3.007402 | 4.123455  | -1.106939 |
| C    | -3.070587 | 4.031307  | 0.285775  |
| C    | -2.406051 | 2.994932  | 0.948356  |
| C    | -1.941031 | -1.231966 | 0.165623  |
| C    | -3.245195 | -0.813534 | 0.488611  |
| C    | -4.320378 | -1.699145 | 0.381363  |
| C    | -4.086655 | -2.995703 | -0.051146 |
| C    | -2.809880 | -3.437326 | -0.378658 |
| C    | -1.736001 | -2.556814 | -0.268166 |
| F    | -5.134880 | -3.860316 | -0.158391 |
| C    | 2.701277  | -0.092626 | 0.238630  |
| C    | 3.208493  | -1.230474 | -0.426871 |
| C    | 4.571580  | -1.397754 | -0.612545 |
| C    | 5.478086  | -0.428123 | -0.135828 |
| C    | 4.986248  | 0.707404  | 0.528341  |
| C    | 3.616227  | 0.868690  | 0.711337  |
| H    | 0.868492  | 2.228713  | 0.611271  |
| H    | 0.933340  | 1.377125  | 2.157176  |
| H    | -1.354878 | 0.816276  | 1.963131  |
| H    | -1.064085 | 1.394927  | -1.734707 |
| H    | -2.231846 | 3.234289  | -2.914554 |
| H    | -3.640136 | 4.759830  | 0.857230  |
| H    | -2.469306 | 2.922493  | 2.032922  |
| H    | -3.436737 | 0.206429  | 0.800601  |
| H    | -5.329591 | -1.381788 | 0.623837  |
| H    | -2.659991 | -4.460262 | -0.709554 |
| H    | -0.733871 | -2.886740 | -0.511927 |
| H    | 2.513578  | -1.976597 | -0.797363 |
| H    | 4.949787  | -2.276176 | -1.126594 |
| H    | 5.679314  | 1.458437  | 0.894815  |
| H    | 3.255281  | 1.756194  | 1.222715  |
| H    | -3.525789 | 4.925293  | -1.625950 |
| C    | 6.886982  | -0.600296 | -0.330018 |
| N    | 8.031680  | -0.744311 | -0.489729 |

**Table S1-15:** Cartesian Atomic Coordinates for the Geometry Optimized Structure of Pyrazoline **2e** (B3LYP/6-31+G(d)).

| Atom | x/Å       | y/Å       | z/Å       |
|------|-----------|-----------|-----------|
| N    | 0.538058  | -0.817038 | 0.355593  |
| N    | -0.691199 | -0.399207 | 0.766314  |
| C    | 1.427293  | 0.093095  | 0.605752  |
| C    | 0.826809  | 1.329142  | 1.249131  |
| C    | -0.697545 | 1.049350  | 1.150058  |
| C    | -1.429305 | 1.926746  | 0.147012  |
| C    | -1.152493 | 1.849241  | -1.226897 |
| C    | -1.804360 | 2.688971  | -2.130803 |
| C    | -2.741697 | 3.621977  | -1.674083 |
| C    | -3.026632 | 3.703485  | -0.309517 |
| C    | -2.375916 | 2.856673  | 0.593334  |
| C    | -1.816269 | -1.123259 | 0.340197  |
| C    | -3.051737 | -0.990988 | 0.992219  |
| C    | -4.189046 | -1.688029 | 0.611685  |
| C    | -4.075534 | -2.578223 | -0.448490 |
| C    | -2.875133 | -2.774997 | -1.118536 |
| C    | -1.756902 | -2.039544 | -0.725517 |
| F    | -5.175835 | -3.278548 | -0.829695 |
| C    | 2.845783  | -0.106916 | 0.326548  |
| C    | 3.316242  | -1.296467 | -0.271399 |
| C    | 4.666041  | -1.475064 | -0.532156 |
| C    | 5.593609  | -0.467144 | -0.196713 |
| C    | 5.138288  | 0.719007  | 0.401627  |
| C    | 3.781617  | 0.892462  | 0.657863  |
| H    | 1.103378  | 2.254830  | 0.733779  |
| H    | 1.153652  | 1.422064  | 2.292896  |
| H    | -1.175147 | 1.154772  | 2.124972  |
| H    | -0.429027 | 1.125201  | -1.593919 |
| H    | -1.583277 | 2.613707  | -3.192477 |
| H    | -3.759051 | 4.419793  | 0.053799  |
| H    | -2.608512 | 2.917178  | 1.654375  |
| F    | -3.153432 | -0.154262 | 2.061963  |
| H    | -5.124658 | -1.549931 | 1.141674  |
| H    | -2.821436 | -3.480021 | -1.941656 |
| H    | -0.812006 | -2.170910 | -1.239165 |
| H    | 2.604595  | -2.075316 | -0.524314 |
| H    | 5.018213  | -2.392522 | -0.993722 |
| H    | 5.848931  | 1.496820  | 0.663444  |
| H    | 3.446873  | 1.814778  | 1.122794  |
| H    | -3.247563 | 4.276923  | -2.378802 |
| C    | 6.989282  | -0.652781 | -0.462347 |
| N    | 8.123721  | -0.805539 | -0.677320 |



**Table S1-16:** Cartesian Atomic Coordinates for the Geometry Optimized Structure of Pyrazoline **2f** (B3LYP/6-31+G(d)).

| Atom | x/Å       | y/Å       | z/Å       |
|------|-----------|-----------|-----------|
| N    | 0.440288  | -0.753083 | 0.438739  |
| N    | -0.799289 | -0.344477 | 0.834465  |
| C    | 1.305046  | 0.191485  | 0.639498  |
| C    | 0.675192  | 1.437127  | 1.234277  |
| C    | -0.841476 | 1.122514  | 1.130277  |
| C    | -1.566975 | 1.917043  | 0.054653  |
| C    | -1.319467 | 1.687746  | -1.306740 |
| C    | -1.959710 | 2.452084  | -2.283311 |
| C    | -2.856504 | 3.459093  | -1.911125 |
| C    | -3.113529 | 3.690299  | -0.558374 |
| C    | -2.474172 | 2.919519  | 0.417957  |
| C    | -1.902273 | -1.135989 | 0.497466  |
| C    | -3.151117 | -0.956565 | 1.116652  |
| C    | -4.259680 | -1.727147 | 0.804932  |
| C    | -4.153882 | -2.750367 | -0.140448 |
| C    | -2.914252 | -2.945322 | -0.737036 |
| C    | -1.800827 | -2.170302 | -0.451607 |
| H    | -4.997775 | -3.379026 | -0.401908 |
| C    | 2.728103  | 0.015547  | 0.363196  |
| C    | 3.225297  | -1.183040 | -0.192782 |
| C    | 4.579303  | -1.339833 | -0.446889 |
| C    | 5.482760  | -0.299603 | -0.146687 |
| C    | 5.000348  | 0.896360  | 0.409098  |
| C    | 3.639730  | 1.047531  | 0.658855  |
| H    | 0.938083  | 2.351625  | 0.693213  |
| H    | 0.990710  | 1.566549  | 2.277977  |
| H    | -1.338562 | 1.280318  | 2.087521  |
| H    | -0.633015 | 0.899412  | -1.605424 |
| H    | -1.761241 | 2.259744  | -3.334574 |
| H    | -3.816646 | 4.463755  | -0.260119 |
| H    | -2.688445 | 3.094882  | 1.470003  |
| F    | -3.283730 | -0.003730 | 2.086591  |
| H    | -5.194053 | -1.530575 | 1.320951  |
| F    | -2.783717 | -3.935532 | -1.661180 |
| H    | -0.859621 | -2.358352 | -0.952271 |
| H    | 2.531878  | -1.985898 | -0.419812 |
| H    | 4.952754  | -2.264140 | -0.876810 |
| H    | 5.693096  | 1.698437  | 0.644206  |
| H    | 3.283704  | 1.976955  | 1.092426  |
| H    | -3.355115 | 4.053350  | -2.672557 |
| C    | 6.882874  | -0.462951 | -0.404486 |
| N    | 8.020793  | -0.597447 | -0.612602 |

**Table S1-17:** Cartesian Atomic Coordinates for the Geometry Optimized Structure of Pyrazoline **2g** (B3LYP/6-31+G(d)).

| Atom | x/Å       | y/Å       | z/Å       |
|------|-----------|-----------|-----------|
| N    | 0.527314  | -0.687892 | 0.042840  |
| N    | -0.738418 | -0.253664 | 0.290741  |
| C    | 1.388871  | 0.191083  | 0.447497  |
| C    | 0.734820  | 1.395611  | 1.098208  |
| C    | -0.781307 | 1.075123  | 0.952876  |
| C    | -1.541709 | 2.127925  | 0.160657  |
| C    | -1.457145 | 2.185739  | -1.237156 |
| C    | -2.111096 | 3.197396  | -1.943030 |
| C    | -2.857974 | 4.163769  | -1.261641 |
| C    | -2.951529 | 4.109178  | 0.131289  |
| C    | -2.296932 | 3.094768  | 0.836268  |
| C    | -1.809964 | -1.137208 | 0.184619  |
| C    | -3.110203 | -0.714864 | 0.526110  |
| C    | -4.152527 | -1.623838 | 0.405142  |
| C    | -3.995511 | -2.930909 | -0.035681 |
| C    | -2.693431 | -3.301182 | -0.360774 |
| C    | -1.600117 | -2.457163 | -0.264678 |
| H    | -4.830250 | -3.615878 | -0.120458 |
| C    | 2.826501  | 0.006864  | 0.267702  |
| C    | 3.341723  | -1.142039 | -0.370389 |
| C    | 4.707326  | -1.307463 | -0.541781 |
| C    | 5.605130  | -0.324525 | -0.077010 |
| C    | 5.104547  | 0.822198  | 0.560411  |
| C    | 3.732256  | 0.981388  | 0.728923  |
| H    | 0.991487  | 2.329926  | 0.587121  |
| H    | 1.038632  | 1.500875  | 2.146370  |
| H    | -1.251209 | 0.960386  | 1.938089  |
| H    | -0.890766 | 1.429417  | -1.774867 |
| H    | -2.040391 | 3.228510  | -3.027306 |
| H    | -3.537944 | 4.849098  | 0.669903  |
| H    | -2.384659 | 3.050712  | 1.920697  |
| H    | -3.327793 | 0.294043  | 0.851671  |
| F    | -5.400608 | -1.205314 | 0.739350  |
| F    | -2.482271 | -4.571975 | -0.789590 |
| H    | -0.610807 | -2.809303 | -0.523401 |
| H    | 2.652804  | -1.898481 | -0.730972 |
| H    | 5.093483  | -2.194357 | -1.034735 |
| H    | 5.791895  | 1.582714  | 0.917757  |
| H    | 3.363345  | 1.876968  | 1.219954  |
| H    | -3.368691 | 4.948289  | -1.813584 |
| C    | 7.016771  | -0.494557 | -0.255860 |
| N    | 8.163357  | -0.635741 | -0.402763 |

**Table S1-18:** Cartesian Atomic Coordinates for the Geometry Optimized Structure of Pyrazoline **2h** (B3LYP/6-31+G(d)).

| Atom | x/Å       | y/Å       | z/Å       |
|------|-----------|-----------|-----------|
| N    | -0.610193 | 0.645292  | 0.475003  |
| N    | 0.586881  | 0.130056  | 0.878393  |
| C    | -1.550595 | -0.230307 | 0.646989  |
| C    | -1.030201 | -1.532836 | 1.224662  |
| C    | 0.507793  | -1.344905 | 1.133320  |
| C    | 1.175759  | -2.166332 | 0.040792  |
| C    | 0.915688  | -1.918770 | -1.315587 |
| C    | 1.509466  | -2.701473 | -2.306630 |
| C    | 2.371499  | -3.745753 | -1.954929 |
| C    | 2.640115  | -3.996385 | -0.608114 |
| C    | 2.047500  | -3.206950 | 0.382906  |
| C    | 1.754993  | 0.829793  | 0.553694  |
| C    | 2.972373  | 0.560154  | 1.199494  |
| C    | 4.146724  | 1.238998  | 0.908826  |
| C    | 4.114981  | 2.250718  | -0.041632 |
| C    | 2.918458  | 2.560796  | -0.682522 |
| C    | 1.754961  | 1.861188  | -0.403464 |
| F    | 5.237613  | 2.940292  | -0.335200 |
| C    | -2.951176 | 0.069815  | 0.362039  |
| C    | -3.336381 | 1.309708  | -0.192398 |
| C    | -4.669133 | 1.587402  | -0.454706 |
| C    | -5.663426 | 0.630902  | -0.164502 |
| C    | -5.292627 | -0.605156 | 0.389595  |
| C    | -3.952511 | -0.878232 | 0.646829  |
| H    | -1.366049 | -2.413823 | 0.669010  |
| H    | -1.360365 | -1.649485 | 2.265309  |
| H    | 0.986116  | -1.566116 | 2.087849  |
| H    | 0.254840  | -1.103478 | -1.599571 |
| H    | 1.301974  | -2.495169 | -3.353474 |
| H    | 3.315417  | -4.800006 | -0.325890 |
| H    | 2.269626  | -3.398799 | 1.430404  |
| F    | 3.016245  | -0.390732 | 2.173374  |
| H    | 5.065777  | 0.996581  | 1.430899  |
| F    | 2.899563  | 3.547899  | -1.604391 |
| H    | 0.840325  | 2.116667  | -0.923810 |
| H    | -2.573573 | 2.049226  | -0.411998 |
| H    | -4.955120 | 2.542757  | -0.883945 |
| H    | -6.055040 | -1.343482 | 0.617826  |
| H    | -3.684422 | -1.837519 | 1.079498  |
| H    | 2.833425  | -4.354454 | -2.727920 |
| C    | -7.042104 | 0.916282  | -0.431729 |
| N    | -8.163355 | 1.145798  | -0.647086 |

**Table S1-19:** Cartesian Atomic Coordinates for the Geometry Optimized Structure of Pyrazoline **2i** (B3LYP/6-31+G(d)).

| Atom | x/Å       | y/Å       | z/Å       |
|------|-----------|-----------|-----------|
| N    | -0.686674 | -0.659330 | -0.445231 |
| N    | 0.549837  | -0.177638 | -0.770678 |
| C    | -1.580603 | 0.250900  | -0.663832 |
| C    | -0.988326 | 1.540313  | -1.204397 |
| C    | 0.539366  | 1.288047  | -1.084186 |
| C    | 1.237931  | 2.113985  | -0.016617 |
| C    | 0.967707  | 1.911797  | 1.345252  |
| C    | 1.595319  | 2.693922  | 2.315724  |
| C    | 2.501878  | 3.690264  | 1.937227  |
| C    | 2.780391  | 3.894649  | 0.584528  |
| C    | 2.153284  | 3.106671  | -0.386406 |
| C    | 1.687130  | -0.902916 | -0.419060 |
| C    | 2.842344  | -0.828951 | -1.219151 |
| C    | 3.999410  | -1.526756 | -0.897384 |
| C    | 4.058474  | -2.354184 | 0.216221  |
| C    | 2.922306  | -2.441716 | 1.010206  |
| C    | 1.765400  | -1.723470 | 0.723551  |
| H    | 4.958038  | -2.907496 | 0.459312  |
| C    | -3.003136 | 0.007604  | -0.433559 |
| C    | -3.452881 | -1.202347 | 0.137024  |
| C    | -4.803811 | -1.421626 | 0.359465  |
| C    | -5.749294 | -0.434891 | 0.012579  |
| C    | -5.312963 | 0.771910  | -0.557669 |
| C    | -3.955309 | 0.986228  | -0.775851 |
| H    | -1.299746 | 2.422693  | -0.636200 |
| H    | -1.289605 | 1.694834  | -2.248303 |
| H    | 1.036448  | 1.449167  | -2.042539 |
| H    | 0.274594  | 1.130917  | 1.649419  |
| H    | 1.380232  | 2.523074  | 3.367394  |
| H    | 3.489987  | 4.660480  | 0.282238  |
| H    | 2.380643  | 3.263642  | -1.438930 |
| F    | 2.823825  | -0.079173 | -2.343550 |
| F    | 5.072970  | -1.410200 | -1.704988 |
| F    | 2.942602  | -3.211042 | 2.117590  |
| F    | 0.737382  | -1.798041 | 1.587031  |
| H    | -2.724722 | -1.960506 | 0.405584  |
| H    | -5.141700 | -2.352720 | 0.803915  |
| H    | -6.038175 | 1.533622  | -0.826647 |
| H    | -3.634138 | 1.923829  | -1.219581 |
| H    | 2.990723  | 4.297897  | 2.694352  |
| C    | -7.145986 | -0.659587 | 0.242542  |
| N    | -8.281073 | -0.841949 | 0.428481  |

**Table S1-20:** Cartesian Atomic Coordinates for the Geometry Optimized Structure of Pyrazoline **2j** (B3LYP/6-31+G(d)).

| Atom | x/Å       | y/Å       | z/Å       |
|------|-----------|-----------|-----------|
| N    | -0.849602 | -0.585617 | -0.442186 |
| N    | 0.349374  | -0.024919 | -0.784211 |
| C    | -1.802297 | 0.265633  | -0.649886 |
| C    | -1.300080 | 1.588904  | -1.198256 |
| C    | 0.241790  | 1.438483  | -1.091066 |
| C    | 0.894552  | 2.306508  | -0.027950 |
| C    | 0.606215  | 2.122504  | 1.333406  |
| C    | 1.193849  | 2.940717  | 2.298920  |
| C    | 2.077753  | 3.956024  | 1.916666  |
| C    | 2.373339  | 4.143399  | 0.565226  |
| C    | 1.786492  | 3.319055  | -0.400793 |
| C    | 1.534534  | -0.678083 | -0.447698 |
| C    | 2.654433  | -0.580842 | -1.291745 |
| C    | 3.859724  | -1.211321 | -1.005211 |
| C    | 3.976828  | -1.994524 | 0.140120  |
| C    | 2.884852  | -2.116963 | 0.995751  |
| C    | 1.693574  | -1.452002 | 0.717189  |
| F    | 5.126795  | -2.624846 | 0.413943  |
| C    | -3.204289 | -0.074490 | -0.413515 |
| C    | -3.567048 | -1.313762 | 0.156087  |
| C    | -4.898885 | -1.629848 | 0.378006  |
| C    | -5.912261 | -0.712661 | 0.032772  |
| C    | -5.562702 | 0.523181  | -0.535071 |
| C    | -4.223727 | 0.834813  | -0.752741 |
| H    | -1.663276 | 2.450538  | -0.629298 |
| H    | -1.619678 | 1.720399  | -2.239779 |
| H    | 0.719864  | 1.632900  | -2.053284 |
| H    | -0.071245 | 1.329493  | 1.641889  |
| H    | 0.964966  | 2.783781  | 3.349820  |
| H    | 3.064217  | 4.925182  | 0.260410  |
| H    | 2.024480  | 3.466119  | -1.452388 |
| F    | 2.561930  | 0.124190  | -2.437904 |
| F    | 4.897705  | -1.093011 | -1.846353 |
| F    | 2.998857  | -2.843477 | 2.117165  |
| F    | 0.702452  | -1.545309 | 1.617499  |
| H    | -2.787497 | -2.019535 | 0.423118  |
| H    | -5.168167 | -2.583861 | 0.820728  |
| H    | -6.340225 | 1.231687  | -0.803477 |
| H    | -3.972709 | 1.793985  | -1.195910 |
| H    | 2.534379  | 4.593060  | 2.669660  |
| C    | -7.289931 | -1.034930 | 0.261567  |
| N    | -8.410493 | -1.292385 | 0.446209  |

**Table S2-1:** Cartesian Atomic Coordinates for the Geometry Optimized Structure of the Pyrazoline **1a** Radical Anion (B3LYP/6-31+G(d)).

| Atom | x/Å       | y/Å       | z/Å       |
|------|-----------|-----------|-----------|
| N    | 0.561718  | -1.123970 | -0.020652 |
| N    | -0.684872 | -0.724314 | 0.472382  |
| C    | 1.485216  | -0.295431 | 0.507378  |
| C    | 0.871161  | 0.673988  | 1.499339  |
| C    | -0.638819 | 0.572951  | 1.159301  |
| C    | -1.130233 | 1.728321  | 0.296619  |
| C    | -0.834534 | 1.775109  | -1.075872 |
| C    | -1.252414 | 2.857084  | -1.852573 |
| C    | -1.971446 | 3.911069  | -1.276018 |
| C    | -2.269557 | 3.872994  | 0.090367  |
| C    | -1.852630 | 2.786816  | 0.865531  |
| C    | -1.811597 | -1.457953 | 0.226597  |
| C    | -3.097275 | -1.033097 | 0.657797  |
| C    | -4.222273 | -1.821134 | 0.424278  |
| C    | -4.129045 | -3.044783 | -0.253935 |
| C    | -2.863541 | -3.460078 | -0.695617 |
| C    | -1.723156 | -2.695936 | -0.471800 |
| H    | -5.013760 | -3.648992 | -0.440685 |
| C    | 2.868453  | -0.370706 | 0.196146  |
| C    | 3.376970  | -1.344352 | -0.732499 |
| C    | 4.728820  | -1.423438 | -1.027809 |
| C    | 5.668526  | -0.556095 | -0.430823 |
| C    | 5.191655  | 0.402208  | 0.486921  |
| C    | 3.840576  | 0.495472  | 0.796616  |
| H    | 6.728477  | -0.631201 | -0.663359 |
| H    | 1.233720  | 1.703642  | 1.404585  |
| H    | 1.046205  | 0.359078  | 2.542468  |
| H    | -1.246610 | 0.533626  | 2.072178  |
| H    | -0.285599 | 0.951322  | -1.523393 |
| H    | -1.020125 | 2.876292  | -2.915341 |
| H    | -2.829619 | 4.684965  | 0.550566  |
| H    | -2.090223 | 2.757123  | 1.928682  |
| H    | -3.215113 | -0.080745 | 1.164325  |
| H    | -5.191263 | -1.463394 | 0.770036  |
| H    | -2.762467 | -4.403698 | -1.230991 |
| H    | -0.748248 | -3.022497 | -0.811940 |
| H    | 2.670926  | -2.024574 | -1.199851 |
| H    | 5.069758  | -2.175648 | -1.740200 |
| H    | 5.892067  | 1.087733  | 0.965048  |
| H    | 3.516153  | 1.248040  | 1.512952  |
| H    | -2.301329 | 4.748854  | -1.886857 |

**Table S2-2:** Cartesian Atomic Coordinates for the Geometry Optimized Structure of the Pyrazoline **1b** Radical Anion (B3LYP/6-31+G(d)).

| Atom | x/Å       | y/Å       | z/Å       |
|------|-----------|-----------|-----------|
| N    | 0.728400  | -1.091550 | 0.052016  |
| N    | -0.507628 | -0.740584 | 0.614170  |
| C    | 1.650467  | -0.247643 | 0.547830  |
| C    | 1.039343  | 0.750447  | 1.510433  |
| C    | -0.468571 | 0.631407  | 1.187804  |
| C    | -0.973310 | 1.693781  | 0.224672  |
| C    | -0.442955 | 1.821502  | -1.074834 |
| C    | -0.900792 | 2.825367  | -1.929995 |
| C    | -1.893678 | 3.720681  | -1.514564 |
| C    | -2.432603 | 3.597007  | -0.228917 |
| C    | -1.975535 | 2.589987  | 0.625910  |
| C    | -1.633286 | -1.391764 | 0.165889  |
| C    | -2.925664 | -1.201147 | 0.706574  |
| C    | -4.046540 | -1.891976 | 0.283665  |
| C    | -3.930701 | -2.866285 | -0.720861 |
| C    | -2.664602 | -3.105298 | -1.265464 |
| C    | -1.544207 | -2.391504 | -0.843654 |
| H    | -4.804226 | -3.420055 | -1.054949 |
| C    | 3.033828  | -0.333159 | 0.228786  |
| C    | 3.538750  | -1.346115 | -0.657216 |
| C    | 4.890955  | -1.440677 | -0.949629 |
| C    | 5.830797  | -0.549769 | -0.391504 |
| C    | 5.356171  | 0.451124  | 0.480429  |
| C    | 4.004777  | 0.560814  | 0.784696  |
| H    | 6.890950  | -0.636951 | -0.618589 |
| H    | 1.403237  | 1.776512  | 1.379113  |
| H    | 1.226204  | 0.469492  | 2.560859  |
| H    | -1.076525 | 0.666074  | 2.092154  |
| H    | 0.324112  | 1.129480  | -1.409344 |
| H    | -0.479482 | 2.908100  | -2.930017 |
| H    | -3.214723 | 4.275939  | 0.105514  |
| H    | -2.411536 | 2.486218  | 1.617924  |
| F    | -3.103151 | -0.302160 | 1.737856  |
| H    | -4.997637 | -1.667614 | 0.759397  |
| H    | -2.541280 | -3.858535 | -2.041888 |
| H    | -0.565895 | -2.577004 | -1.268023 |
| H    | 2.831148  | -2.044016 | -1.095175 |
| H    | 5.229992  | -2.224305 | -1.628157 |
| H    | 6.058217  | 1.154795  | 0.928452  |
| H    | 3.681636  | 1.345981  | 1.465709  |
| H    | -2.247097 | 4.499586  | -2.187279 |

**Table S2-3:** Cartesian Atomic Coordinates for the Geometry Optimized Structure of the Pyrazoline **1c** Radical Anion (B3LYP/6-31+G(d)).

| Atom | x/Å       | y/Å       | z/Å       |
|------|-----------|-----------|-----------|
| N    | 0.765566  | -1.098116 | -0.086583 |
| N    | -0.467677 | -0.630118 | 0.376749  |
| C    | 1.721600  | -0.342267 | 0.491311  |
| C    | 1.138877  | 0.646740  | 1.483153  |
| C    | -0.364247 | 0.645543  | 1.102722  |
| C    | -0.773380 | 1.845435  | 0.260608  |
| C    | -0.395025 | 1.935056  | -1.089353 |
| C    | -0.741679 | 3.054586  | -1.846961 |
| C    | -1.470472 | 4.104047  | -1.273733 |
| C    | -1.853096 | 4.021644  | 0.069197  |
| C    | -1.506222 | 2.898364  | 0.825806  |
| C    | -1.623187 | -1.302275 | 0.115041  |
| C    | -2.891456 | -0.793561 | 0.513067  |
| C    | -4.025277 | -1.537955 | 0.244304  |
| C    | -4.023739 | -2.764497 | -0.412258 |
| C    | -2.766698 | -3.250450 | -0.812769 |
| C    | -1.590689 | -2.553872 | -0.568801 |
| H    | -4.950204 | -3.295053 | -0.604773 |
| C    | 3.107148  | -0.494754 | 0.220383  |
| C    | 3.587107  | -1.470619 | -0.720485 |
| C    | 4.941277  | -1.620961 | -0.976416 |
| C    | 5.909116  | -0.827471 | -0.325140 |
| C    | 5.460005  | 0.131324  | 0.605553  |
| C    | 4.107188  | 0.296012  | 0.875584  |
| H    | 6.970019  | -0.957580 | -0.526754 |
| H    | 1.572142  | 1.651562  | 1.413037  |
| H    | 1.267629  | 0.307951  | 2.525132  |
| H    | -0.997851 | 0.611219  | 1.998115  |
| H    | 0.161026  | 1.114982  | -1.535285 |
| H    | -0.446387 | 3.107445  | -2.892756 |
| H    | -2.427607 | 4.826141  | 0.524503  |
| H    | -1.810065 | 2.834353  | 1.870218  |
| H    | -2.998605 | 0.167198  | 1.001937  |
| F    | -5.236708 | -1.017469 | 0.643950  |
| H    | -2.711425 | -4.204700 | -1.334229 |
| H    | -0.628777 | -2.942276 | -0.878162 |
| H    | 2.858175  | -2.092902 | -1.231510 |
| H    | 5.260602  | -2.370048 | -1.701855 |
| H    | 6.183425  | 0.759739  | 1.125767  |
| H    | 3.803848  | 1.044518  | 1.605200  |
| H    | -1.743714 | 4.971914  | -1.870169 |



**Table S2-4:** Cartesian Atomic Coordinates for the Geometry Optimized Structure of the Pyrazoline **1d** Radical Anion (B3LYP/6-31+G(d)).

| Atom | x/Å       | y/Å       | z/Å       |
|------|-----------|-----------|-----------|
| N    | 0.670511  | -1.054100 | 0.013817  |
| N    | -0.481679 | -0.458355 | 0.538102  |
| C    | 1.726627  | -0.367272 | 0.493160  |
| C    | 1.302320  | 0.721634  | 1.459779  |
| C    | -0.218356 | 0.836359  | 1.180506  |
| C    | -0.576021 | 2.025209  | 0.298001  |
| C    | -0.249924 | 2.025835  | -1.069771 |
| C    | -0.542299 | 3.133965  | -1.865517 |
| C    | -1.165873 | 4.261108  | -1.315344 |
| C    | -1.497901 | 4.267535  | 0.043715  |
| C    | -1.205386 | 3.155414  | 0.838956  |
| C    | -1.718598 | -0.995288 | 0.304910  |
| C    | -2.905019 | -0.385222 | 0.788951  |
| C    | -4.153678 | -0.971836 | 0.578526  |
| C    | -4.235128 | -2.164899 | -0.129362 |
| C    | -3.099370 | -2.786112 | -0.633536 |
| C    | -1.846799 | -2.211044 | -0.424970 |
| F    | -5.474834 | -2.736974 | -0.345502 |
| C    | 3.074571  | -0.679105 | 0.171794  |
| C    | 3.406255  | -1.761005 | -0.715020 |
| C    | 4.724230  | -2.077320 | -1.006006 |
| C    | 5.799140  | -1.354225 | -0.446894 |
| C    | 5.495713  | -0.289899 | 0.425936  |
| C    | 4.181144  | 0.041445  | 0.729596  |
| H    | 6.830041  | -1.616647 | -0.673737 |
| H    | 1.808068  | 1.681414  | 1.302434  |
| H    | 1.478772  | 0.429153  | 2.508826  |
| H    | -0.787356 | 0.912043  | 2.116337  |
| H    | 0.223598  | 1.147598  | -1.499644 |
| H    | -0.286521 | 3.117365  | -2.922941 |
| H    | -1.987280 | 5.135063  | 0.482584  |
| H    | -1.468785 | 3.161613  | 1.896519  |
| H    | -2.855632 | 0.554693  | 1.327817  |
| H    | -5.057637 | -0.499185 | 0.952941  |
| H    | -3.195108 | -3.714774 | -1.190527 |
| H    | -0.947899 | -2.678767 | -0.805738 |
| H    | 2.593717  | -2.334424 | -1.151653 |
| H    | 4.930242  | -2.906278 | -1.684094 |
| H    | 6.303686  | 0.289430  | 0.873561  |
| H    | 3.992406  | 0.869488  | 1.410263  |
| H    | -1.396530 | 5.120509  | -1.941310 |

**Table S2-5:** Cartesian Atomic Coordinates for the Geometry Optimized Structure of the Pyrazoline **1e** Radical Anion (B3LYP/6-31+G(d)).

| Atom | x/Å       | y/Å       | z/Å       |
|------|-----------|-----------|-----------|
| N    | -0.839385 | -1.053346 | -0.163843 |
| N    | 0.313739  | -0.517662 | -0.762827 |
| C    | -1.881756 | -0.305452 | -0.563928 |
| C    | -1.448075 | 0.823388  | -1.476885 |
| C    | 0.076249  | 0.877982  | -1.225915 |
| C    | 0.491095  | 1.926427  | -0.206515 |
| C    | -0.015087 | 1.912820  | 1.109567  |
| C    | 0.359785  | 2.900154  | 2.022092  |
| C    | 1.242513  | 3.920406  | 1.647782  |
| C    | 1.757634  | 3.937227  | 0.346128  |
| C    | 1.386324  | 2.945291  | -0.565352 |
| C    | 1.533479  | -1.007699 | -0.341173 |
| C    | 2.766649  | -0.633699 | -0.916314 |
| C    | 3.990563  | -1.163210 | -0.536375 |
| C    | 3.999406  | -2.144001 | 0.452977  |
| C    | 2.827324  | -2.582695 | 1.046279  |
| C    | 1.609973  | -2.015590 | 0.658294  |
| F    | 5.206607  | -2.692236 | 0.825844  |
| C    | -3.229296 | -0.584343 | -0.202095 |
| C    | -3.569100 | -1.697548 | 0.639829  |
| C    | -4.887328 | -1.976653 | 0.968364  |
| C    | -5.950927 | -1.184095 | 0.489625  |
| C    | -5.638956 | -0.089003 | -0.340549 |
| C    | -4.324139 | 0.206558  | -0.678290 |
| H    | -6.982291 | -1.417791 | 0.744045  |
| H    | -1.924583 | 1.785607  | -1.257219 |
| H    | -1.652673 | 0.590389  | -2.535644 |
| H    | 0.626638  | 1.052784  | -2.151561 |
| H    | -0.698111 | 1.123046  | 1.408160  |
| H    | -0.040183 | 2.872373  | 3.033852  |
| H    | 2.452806  | 4.718062  | 0.043126  |
| H    | 1.802506  | 2.953878  | -1.570936 |
| F    | 2.790714  | 0.282353  | -1.939225 |
| H    | 4.903234  | -0.826560 | -1.015943 |
| H    | 2.860926  | -3.354487 | 1.810328  |
| H    | 0.678540  | -2.338628 | 1.104285  |
| H    | -2.764757 | -2.325678 | 1.011452  |
| H    | -5.101946 | -2.831153 | 1.610973  |
| H    | -6.439220 | 0.541192  | -0.728902 |
| H    | -4.125706 | 1.057198  | -1.327172 |
| H    | 1.530457  | 4.688183  | 2.362985  |

**Table S2-6:** Cartesian Atomic Coordinates for the Geometry Optimized Structure of the Pyrazoline **1f** Radical Anion (B3LYP/6-31+G(d)).

| Atom | x/Å       | y/Å       | z/Å       |
|------|-----------|-----------|-----------|
| N    | -0.738207 | -0.981794 | -0.255609 |
| N    | 0.426531  | -0.416448 | -0.793767 |
| C    | -1.767885 | -0.187815 | -0.603673 |
| C    | -1.312742 | 0.985999  | -1.445592 |
| C    | 0.212387  | 0.998849  | -1.187665 |
| C    | 0.634743  | 1.979012  | -0.103463 |
| C    | 0.312193  | 1.755608  | 1.247256  |
| C    | 0.673647  | 2.685094  | 2.224356  |
| C    | 1.360179  | 3.854174  | 1.876470  |
| C    | 1.691836  | 4.081128  | 0.536621  |
| C    | 1.333572  | 3.147275  | -0.439833 |
| C    | 1.633112  | -0.982845 | -0.473369 |
| C    | 2.879064  | -0.558976 | -0.998294 |
| C    | 4.081899  | -1.165355 | -0.693796 |
| C    | 4.121845  | -2.281623 | 0.161923  |
| C    | 2.901913  | -2.716927 | 0.663600  |
| C    | 1.685723  | -2.118310 | 0.386127  |
| H    | 5.048109  | -2.786270 | 0.413519  |
| C    | -3.120096 | -0.460331 | -0.259524 |
| C    | -3.484079 | -1.603677 | 0.530021  |
| C    | -4.808667 | -1.871707 | 0.841648  |
| C    | -5.855040 | -1.037555 | 0.396704  |
| C    | -5.519164 | 0.088236  | -0.380844 |
| C    | -4.197711 | 0.373459  | -0.701080 |
| H    | -6.891525 | -1.262408 | 0.637934  |
| H    | -1.778482 | 1.940405  | -1.173915 |
| H    | -1.515464 | 0.818108  | -2.517413 |
| H    | 0.767159  | 1.219748  | -2.100224 |
| H    | -0.210338 | 0.843955  | 1.523791  |
| H    | 0.420550  | 2.493101  | 3.265003  |
| H    | 2.237146  | 4.979197  | 0.252293  |
| H    | 1.607262  | 3.322974  | -1.478590 |
| F    | 2.919225  | 0.490305  | -1.890579 |
| H    | 4.987563  | -0.767013 | -1.142064 |
| F    | 2.901635  | -3.809091 | 1.498982  |
| H    | 0.763779  | -2.493914 | 0.808579  |
| H    | -2.692881 | -2.260561 | 0.879583  |
| H    | -5.041972 | -2.749408 | 1.445122  |
| H    | -6.305727 | 0.750908  | -0.742072 |
| H    | -3.980353 | 1.249736  | -1.308614 |
| H    | 1.638809  | 4.575944  | 2.641492  |

**Table S2-7:** Cartesian Atomic Coordinates for the Geometry Optimized Structure of the Pyrazoline **1g** Radical Anion (B3LYP/6-31+G(d)).

| Atom | x/Å       | y/Å       | z/Å       |
|------|-----------|-----------|-----------|
| N    | 0.776689  | 0.984965  | -0.008133 |
| N    | -0.385923 | 0.348361  | -0.449182 |
| C    | 1.823205  | 0.307293  | -0.525670 |
| C    | 1.374401  | -0.797319 | -1.463045 |
| C    | -0.125267 | -0.946518 | -1.098395 |
| C    | -0.403818 | -2.137053 | -0.191486 |
| C    | -0.048839 | -2.106187 | 1.167398  |
| C    | -0.267473 | -3.220441 | 1.979287  |
| C    | -0.843407 | -4.382386 | 1.451988  |
| C    | -1.200774 | -4.420887 | 0.100249  |
| C    | -0.982454 | -3.303481 | -0.710755 |
| C    | -1.611646 | 0.903435  | -0.262065 |
| C    | -2.806858 | 0.228091  | -0.647994 |
| C    | -4.019482 | 0.861221  | -0.458601 |
| C    | -4.174883 | 2.127403  | 0.103797  |
| C    | -2.980751 | 2.746815  | 0.478767  |
| C    | -1.725360 | 2.198914  | 0.326957  |
| H    | -5.144244 | 2.587033  | 0.249065  |
| C    | 3.176135  | 0.640048  | -0.251732 |
| C    | 3.517339  | 1.726856  | 0.624671  |
| C    | 4.838207  | 2.060213  | 0.880382  |
| C    | 5.906015  | 1.350583  | 0.291988  |
| C    | 5.593299  | 0.283466  | -0.573234 |
| C    | 4.275370  | -0.064895 | -0.841954 |
| H    | 6.939201  | 1.624921  | 0.492459  |
| H    | 1.909562  | -1.744125 | -1.329481 |
| H    | 1.483280  | -0.505699 | -2.521341 |
| H    | -0.746911 | -1.037280 | -1.997439 |
| H    | 0.388791  | -1.200734 | 1.578428  |
| H    | 0.008448  | -3.180493 | 3.030868  |
| H    | -1.653739 | -5.316376 | -0.320528 |
| H    | -1.266399 | -3.333123 | -1.762341 |
| H    | -2.794402 | -0.770617 | -1.065890 |
| F    | -5.158719 | 0.195031  | -0.841752 |
| F    | -3.076776 | 3.996605  | 1.037894  |
| H    | -0.835758 | 2.733712  | 0.630639  |
| H    | 2.709514  | 2.288529  | 1.084489  |
| H    | 5.051447  | 2.891126  | 1.553554  |
| H    | 6.396505  | -0.285003 | -1.042568 |
| H    | 4.078953  | -0.895177 | -1.517767 |
| H    | -1.017929 | -5.245724 | 2.090458  |

**Table S2-8:** Cartesian Atomic Coordinates for the Geometry Optimized Structure of the Pyrazoline **1h** Radical Anion (B3LYP/6-31+G(d)).

| Atom | x/Å       | y/Å       | z/Å       |
|------|-----------|-----------|-----------|
| N    | -0.884625 | -0.949708 | -0.318531 |
| N    | 0.201024  | -0.250922 | -0.868619 |
| C    | -2.000214 | -0.264205 | -0.623629 |
| C    | -1.694673 | 0.979939  | -1.430901 |
| C    | -0.173505 | 1.149813  | -1.207011 |
| C    | 0.172527  | 2.136622  | -0.103219 |
| C    | -0.198853 | 1.895959  | 1.233788  |
| C    | 0.107780  | 2.822966  | 2.231320  |
| C    | 0.783614  | 4.008754  | 1.920424  |
| C    | 1.156919  | 4.256727  | 0.594973  |
| C    | 0.855021  | 3.324949  | -0.402126 |
| C    | 1.466870  | -0.674666 | -0.538682 |
| C    | 2.652739  | -0.115819 | -1.066310 |
| C    | 3.921385  | -0.584781 | -0.768817 |
| C    | 4.054319  | -1.685494 | 0.078540  |
| C    | 2.914356  | -2.278273 | 0.600971  |
| C    | 1.645300  | -1.795399 | 0.320661  |
| F    | 5.294926  | -2.186865 | 0.359804  |
| C    | -3.305944 | -0.696011 | -0.258347 |
| C    | -3.517697 | -1.896094 | 0.500784  |
| C    | -4.794280 | -2.317957 | 0.840958  |
| C    | -5.938436 | -1.591281 | 0.453558  |
| C    | -5.752668 | -0.413117 | -0.295614 |
| C    | -4.480881 | 0.025342  | -0.643482 |
| H    | -6.936050 | -1.934266 | 0.717868  |
| H    | -2.250181 | 1.866973  | -1.105823 |
| H    | -1.907432 | 0.834517  | -2.503785 |
| H    | 0.332350  | 1.453676  | -2.124799 |
| H    | -0.717998 | 0.975381  | 1.484255  |
| H    | -0.179928 | 2.615832  | 3.260035  |
| H    | 1.691737  | 5.169204  | 0.338180  |
| H    | 1.162671  | 3.516969  | -1.428209 |
| F    | 2.577845  | 0.929077  | -1.954430 |
| H    | 4.793121  | -0.109644 | -1.205031 |
| F    | 3.052080  | -3.361142 | 1.418909  |
| H    | 0.769443  | -2.267402 | 0.744984  |
| H    | -2.649643 | -2.472119 | 0.807463  |
| H    | -4.910464 | -3.233538 | 1.421453  |
| H    | -6.618292 | 0.167503  | -0.614815 |
| H    | -4.381135 | 0.936734  | -1.229494 |
| H    | 1.021279  | 4.727114  | 2.702184  |

**Table S2-9:** Cartesian Atomic Coordinates for the Geometry Optimized Structure of the Pyrazoline **1i** Radical Anion (B3LYP/6-31+G(d)).

| Atom | x/Å       | y/Å       | z/Å       |
|------|-----------|-----------|-----------|
| N    | -1.024594 | -0.921714 | -0.375667 |
| N    | 0.147927  | -0.285110 | -0.775036 |
| C    | -2.053240 | -0.110549 | -0.661621 |
| C    | -1.604676 | 1.140795  | -1.388344 |
| C    | -0.078063 | 1.145496  | -1.138515 |
| C    | 0.363792  | 2.089601  | -0.032139 |
| C    | -0.061767 | 1.900980  | 1.296038  |
| C    | 0.328845  | 2.789630  | 2.297655  |
| C    | 1.149592  | 3.884668  | 1.997195  |
| C    | 1.579839  | 4.078318  | 0.680976  |
| C    | 1.191694  | 3.183675  | -0.321157 |
| C    | 1.374056  | -0.778493 | -0.400179 |
| C    | 2.545750  | -0.511012 | -1.164438 |
| C    | 3.776249  | -1.059423 | -0.862789 |
| C    | 3.957374  | -1.947883 | 0.199095  |
| C    | 2.820374  | -2.225142 | 0.957547  |
| C    | 1.579979  | -1.663752 | 0.701599  |
| H    | 4.919994  | -2.389545 | 0.422818  |
| C    | -3.409407 | -0.439929 | -0.378183 |
| C    | -3.760239 | -1.640394 | 0.325380  |
| C    | -5.083394 | -1.959992 | 0.587254  |
| C    | -6.140155 | -1.124548 | 0.168972  |
| C    | -5.816885 | 0.053660  | -0.530231 |
| C    | -4.495683 | 0.390420  | -0.800988 |
| H    | -7.175698 | -1.387561 | 0.372338  |
| H    | -2.076273 | 2.058004  | -1.017520 |
| H    | -1.814346 | 1.080556  | -2.469587 |
| H    | 0.473335  | 1.387066  | -2.048772 |
| H    | -0.689283 | 1.046765  | 1.536531  |
| H    | -0.003580 | 2.623508  | 3.320177  |
| H    | 2.225827  | 4.918846  | 0.434762  |
| H    | 1.539612  | 3.333541  | -1.341608 |
| F    | 2.454758  | 0.285463  | -2.267554 |
| F    | 4.842091  | -0.745710 | -1.653226 |
| F    | 2.945295  | -3.043016 | 2.039704  |
| F    | 0.587350  | -1.921309 | 1.581652  |
| H    | -2.959021 | -2.295531 | 0.654492  |
| H    | -5.307541 | -2.878368 | 1.130321  |
| H    | -6.612658 | 0.716166  | -0.870941 |
| H    | -4.287452 | 1.304505  | -1.353618 |
| H    | 1.454089  | 4.574208  | 2.781581  |

**Table S2-10:** Cartesian Atomic Coordinates for the Geometry Optimized Structure of the Pyrazoline **1j** Radical Anion (B3LYP/6-31+G(d)).

| Atom | x/Å       | y/Å       | z/Å       |
|------|-----------|-----------|-----------|
| N    | -1.122082 | -0.880738 | -0.448647 |
| N    | -0.041271 | -0.131670 | -0.811634 |
| C    | -2.230417 | -0.204247 | -0.675031 |
| C    | -1.947985 | 1.125403  | -1.352523 |
| C    | -0.416906 | 1.271783  | -1.155706 |
| C    | -0.038159 | 2.273036  | -0.073403 |
| C    | -0.317271 | 2.022943  | 1.279382  |
| C    | -0.013464 | 2.973909  | 2.253644  |
| C    | 0.575278  | 4.192825  | 1.895606  |
| C    | 0.859587  | 4.449398  | 0.552663  |
| C    | 0.553311  | 3.494154  | -0.422034 |
| C    | 1.249375  | -0.494992 | -0.402782 |
| C    | 2.374723  | -0.284483 | -1.237959 |
| C    | 3.613274  | -0.816745 | -0.966319 |
| C    | 3.828299  | -1.601321 | 0.180217  |
| C    | 2.739385  | -1.805057 | 1.035918  |
| C    | 1.510097  | -1.236747 | 0.781883  |
| F    | 4.874825  | -2.515842 | 0.182107  |
| C    | -3.540690 | -0.725048 | -0.376458 |
| C    | -3.713361 | -1.958479 | 0.312951  |
| C    | -4.981205 | -2.450058 | 0.594263  |
| C    | -6.136403 | -1.747064 | 0.206277  |
| C    | -5.984180 | -0.533054 | -0.477036 |
| C    | -4.716252 | -0.030624 | -0.765911 |
| H    | -7.126262 | -2.137770 | 0.430024  |
| H    | -2.499511 | 1.965685  | -0.917005 |
| H    | -2.201167 | 1.086976  | -2.423881 |
| H    | 0.083076  | 1.556507  | -2.083926 |
| H    | -0.751005 | 1.070194  | 1.568699  |
| H    | -0.226656 | 2.757949  | 3.298025  |
| H    | 1.331753  | 5.385423  | 0.261633  |
| H    | 0.789636  | 3.693580  | -1.465482 |
| F    | 2.244229  | 0.555521  | -2.319607 |
| F    | 4.678547  | -0.490983 | -1.766851 |
| F    | 2.934634  | -2.483312 | 2.209835  |
| F    | 0.570269  | -1.260187 | 1.773445  |
| H    | -2.828474 | -2.506027 | 0.623092  |
| H    | -5.077255 | -3.393938 | 1.128913  |
| H    | -6.863224 | 0.028622  | -0.789868 |
| H    | -4.631054 | 0.910976  | -1.303227 |
| H    | 0.818865  | 4.928707  | 2.658764  |

**Table S2-11:** Cartesian Atomic Coordinates for the Geometry Optimized Structure of the Pyrazoline **2a** Radical Anion (B3LYP/6-31+G(d)).

| Atom | x/Å       | y/Å       | z/Å       |
|------|-----------|-----------|-----------|
| N    | 0.227126  | -1.012928 | -0.048907 |
| N    | -1.086016 | -0.680628 | 0.286982  |
| C    | 1.032464  | -0.059731 | 0.419996  |
| C    | 0.274835  | 1.016331  | 1.182291  |
| C    | -1.210030 | 0.599078  | 1.000736  |
| C    | -2.023508 | 1.641299  | 0.241643  |
| C    | -1.912049 | 1.764794  | -1.150579 |
| C    | -2.624527 | 2.750770  | -1.835724 |
| C    | -3.465085 | 3.627836  | -1.140347 |
| C    | -3.587496 | 3.507819  | 0.246192  |
| C    | -2.870871 | 2.519876  | 0.928971  |
| C    | -2.090901 | -1.608577 | 0.160254  |
| C    | -3.422141 | -1.320865 | 0.554900  |
| C    | -4.429203 | -2.273447 | 0.403244  |
| C    | -4.161327 | -3.534159 | -0.142952 |
| C    | -2.844805 | -3.822458 | -0.531295 |
| C    | -1.821521 | -2.891233 | -0.388130 |
| H    | -4.953193 | -4.268966 | -0.266896 |
| C    | 2.439651  | -0.058774 | 0.240809  |
| C    | 3.110871  | -1.113675 | -0.473088 |
| C    | 4.475003  | -1.117133 | -0.645766 |
| C    | 5.295651  | -0.068568 | -0.122393 |
| C    | 4.642469  | 0.982913  | 0.589762  |
| C    | 3.274339  | 0.984997  | 0.763953  |
| H    | 0.453103  | 2.020800  | 0.778330  |
| H    | 0.558415  | 1.042755  | 2.243803  |
| H    | -1.690535 | 0.430814  | 1.976452  |
| H    | -1.271231 | 1.073376  | -1.691791 |
| H    | -2.526369 | 2.832841  | -2.915953 |
| H    | -4.246525 | 4.176290  | 0.796817  |
| H    | -2.980031 | 2.423033  | 2.008362  |
| H    | -3.672365 | -0.345680 | 0.958463  |
| H    | -5.441639 | -2.016979 | 0.711210  |
| H    | -2.607423 | -4.797328 | -0.954937 |
| H    | -0.805513 | -3.123468 | -0.682257 |
| H    | 2.509811  | -1.920591 | -0.881315 |
| H    | 4.948594  | -1.931624 | -1.189944 |
| H    | 5.240976  | 1.793762  | 0.999036  |
| H    | 2.822403  | 1.809423  | 1.311463  |
| H    | -4.024312 | 4.391925  | -1.675858 |
| C    | 6.695858  | -0.070287 | -0.303505 |
| N    | 7.861713  | -0.068047 | -0.455048 |



**Table S2-12:** Cartesian Atomic Coordinates for the Geometry Optimized Structure of the Pyrazoline **2b** Radical Anion (B3LYP/6-31+G(d)).

| Atom | x/Å       | y/Å       | z/Å       |
|------|-----------|-----------|-----------|
| N    | 0.257291  | -1.031915 | 0.158733  |
| N    | -1.018481 | -0.724570 | 0.653231  |
| C    | 1.114185  | -0.131836 | 0.644153  |
| C    | 0.419540  | 0.882573  | 1.537311  |
| C    | -1.071101 | 0.659701  | 1.191678  |
| C    | -1.620887 | 1.674134  | 0.197964  |
| C    | -1.102395 | 1.783944  | -1.104639 |
| C    | -1.595191 | 2.749099  | -1.984480 |
| C    | -2.613715 | 3.621934  | -1.584676 |
| C    | -3.140364 | 3.516625  | -0.294478 |
| C    | -2.647155 | 2.547410  | 0.584362  |
| C    | -2.088633 | -1.445424 | 0.166879  |
| C    | -3.409728 | -1.304861 | 0.647714  |
| C    | -4.477227 | -2.055779 | 0.189261  |
| C    | -4.270560 | -3.037735 | -0.789311 |
| C    | -2.972187 | -3.227055 | -1.274160 |
| C    | -1.907335 | -2.453438 | -0.816592 |
| H    | -5.100960 | -3.638649 | -1.149840 |
| C    | 2.509206  | -0.164253 | 0.383642  |
| C    | 3.098325  | -1.201298 | -0.423150 |
| C    | 4.450719  | -1.247160 | -0.669851 |
| C    | 5.338889  | -0.263244 | -0.135511 |
| C    | 4.767869  | 0.771378  | 0.666067  |
| C    | 3.411742  | 0.816285  | 0.913610  |
| H    | 0.729219  | 1.917286  | 1.356209  |
| H    | 0.606460  | 0.664238  | 2.600327  |
| H    | -1.694333 | 0.681120  | 2.086152  |
| H    | -0.313175 | 1.110187  | -1.425750 |
| H    | -1.181329 | 2.819804  | -2.988061 |
| H    | -3.940862 | 4.179908  | 0.026626  |
| H    | -3.072624 | 2.456958  | 1.582023  |
| F    | -3.670176 | -0.397884 | 1.650649  |
| H    | -5.457632 | -1.870400 | 0.619718  |
| H    | -2.779448 | -3.986684 | -2.029162 |
| H    | -0.903828 | -2.602839 | -1.193616 |
| H    | 2.444534  | -1.962285 | -0.838422 |
| H    | 4.860759  | -2.047128 | -1.282978 |
| H    | 5.420182  | 1.534276  | 1.085177  |
| H    | 3.023288  | 1.623632  | 1.530734  |
| H    | -2.994852 | 4.371833  | -2.274560 |
| C    | 6.727783  | -0.312029 | -0.388397 |
| N    | 7.883406  | -0.349820 | -0.598366 |

**Table S2-13:** Cartesian Atomic Coordinates for the Geometry Optimized Structure of the Pyrazoline **2c** Radical Anion (B3LYP/6-31+G(d)).

| Atom | x/Å       | y/Å       | z/Å       |
|------|-----------|-----------|-----------|
| N    | 0.330567  | -0.996882 | -0.022408 |
| N    | -0.947601 | -0.601475 | 0.375916  |
| C    | 1.209688  | -0.159651 | 0.536440  |
| C    | 0.532347  | 0.852446  | 1.448733  |
| C    | -0.965046 | 0.686149  | 1.083291  |
| C    | -1.502935 | 1.831355  | 0.233549  |
| C    | -1.235836 | 1.892881  | -1.141361 |
| C    | -1.688884 | 2.972078  | -1.902129 |
| C    | -2.418356 | 4.005142  | -1.302513 |
| C    | -2.693969 | 3.948518  | 0.066521  |
| C    | -2.238034 | 2.866739  | 0.825898  |
| C    | -2.040058 | -1.380681 | 0.117037  |
| C    | -3.348510 | -0.957873 | 0.472157  |
| C    | -4.417708 | -1.793713 | 0.200812  |
| C    | -4.304748 | -3.034653 | -0.414343 |
| C    | -3.006091 | -3.437938 | -0.767076 |
| C    | -1.892637 | -2.646023 | -0.517706 |
| H    | -5.182400 | -3.641765 | -0.608939 |
| C    | 2.609813  | -0.234169 | 0.326250  |
| C    | 3.192349  | -1.234251 | -0.530541 |
| C    | 4.549924  | -1.306725 | -0.738680 |
| C    | 5.450418  | -0.391908 | -0.109321 |
| C    | 4.886575  | 0.600873  | 0.747863  |
| C    | 3.525406  | 0.673403  | 0.956541  |
| H    | 0.876540  | 1.880153  | 1.288893  |
| H    | 0.705935  | 0.610833  | 2.508438  |
| H    | -1.581053 | 0.600667  | 1.987949  |
| H    | -0.677880 | 1.084828  | -1.606935 |
| H    | -1.474669 | 3.005738  | -2.967954 |
| H    | -3.268742 | 4.740691  | 0.541915  |
| H    | -2.458926 | 2.821916  | 1.891750  |
| H    | -3.539564 | 0.005495  | 0.929121  |
| F    | -5.670558 | -1.354862 | 0.557794  |
| H    | -2.865222 | -4.402131 | -1.251874 |
| H    | -0.896863 | -2.972495 | -0.789035 |
| H    | 2.529134  | -1.941743 | -1.019178 |
| H    | 4.955162  | -2.072510 | -1.396892 |
| H    | 5.548147  | 1.310415  | 1.239871  |
| H    | 3.142540  | 1.445285  | 1.620831  |
| H    | -2.773699 | 4.842352  | -1.899010 |
| C    | 6.844239  | -0.465109 | -0.326821 |
| N    | 8.004019  | -0.522400 | -0.507322 |

**Table S2-14:** Cartesian Atomic Coordinates for the Geometry Optimized Structure of the Pyrazoline **2d** Radical Anion (B3LYP/6-31+G(d)).

| Atom | x/Å       | y/Å       | z/Å       |
|------|-----------|-----------|-----------|
| N    | 0.244072  | -0.896371 | 0.031481  |
| N    | -0.996588 | -0.390526 | 0.421032  |
| C    | 1.190056  | -0.110493 | 0.554405  |
| C    | 0.600274  | 0.966471  | 1.453605  |
| C    | -0.911372 | 0.901592  | 1.110686  |
| C    | -1.374618 | 2.076073  | 0.255901  |
| C    | -1.127159 | 2.101094  | -1.124054 |
| C    | -1.498908 | 3.207781  | -1.889501 |
| C    | -2.127172 | 4.305224  | -1.289691 |
| C    | -2.383063 | 4.285911  | 0.084371  |
| C    | -2.008831 | 3.176369  | 0.848275  |
| C    | -2.142631 | -1.121129 | 0.232273  |
| C    | -3.419422 | -0.603402 | 0.567391  |
| C    | -4.573528 | -1.367719 | 0.383364  |
| C    | -4.466165 | -2.646387 | -0.146139 |
| C    | -3.233658 | -3.183811 | -0.498780 |
| C    | -2.076185 | -2.431025 | -0.314315 |
| F    | -5.608745 | -3.395215 | -0.334891 |
| C    | 2.576784  | -0.290601 | 0.320893  |
| C    | 3.066414  | -1.357576 | -0.513260 |
| C    | 4.410023  | -1.538471 | -0.743764 |
| C    | 5.389546  | -0.673832 | -0.163273 |
| C    | 4.918008  | 0.387108  | 0.667925  |
| C    | 3.570483  | 0.567122  | 0.900353  |
| H    | 1.012724  | 1.964931  | 1.271653  |
| H    | 0.771373  | 0.731796  | 2.515346  |
| H    | -1.520232 | 0.873733  | 2.024627  |
| H    | -0.647152 | 1.243962  | -1.588683 |
| H    | -1.299103 | 3.213382  | -2.958636 |
| H    | -2.875260 | 5.131292  | 0.560828  |
| H    | -2.212598 | 3.161291  | 1.918540  |
| H    | -3.517338 | 0.405926  | 0.952193  |
| H    | -5.550498 | -0.966116 | 0.637587  |
| H    | -3.180954 | -4.186625 | -0.914206 |
| H    | -1.104909 | -2.831721 | -0.575992 |
| H    | 2.342990  | -2.028908 | -0.966250 |
| H    | 4.742642  | -2.354262 | -1.382440 |
| H    | 5.639726  | 1.063587  | 1.120514  |
| H    | 3.260584  | 1.390572  | 1.540638  |
| H    | -2.418601 | 5.164537  | -1.889378 |
| C    | 6.768856  | -0.862422 | -0.401165 |
| N    | 7.916645  | -1.019917 | -0.598989 |

**Table S2-15:** Cartesian Atomic Coordinates for the Geometry Optimized Structure of the Pyrazoline **2e** Radical Anion (B3LYP/6-31+G(d)).

| Atom | x/Å       | y/Å       | z/Å       |
|------|-----------|-----------|-----------|
| N    | 0.405310  | -0.921052 | 0.275297  |
| N    | -0.817120 | -0.466278 | 0.795444  |
| C    | 1.358441  | -0.079127 | 0.681954  |
| C    | 0.789752  | 1.047999  | 1.528175  |
| C    | -0.722787 | 0.953336  | 1.228150  |
| C    | -1.199099 | 1.942002  | 0.172895  |
| C    | -0.678467 | 1.929813  | -1.134093 |
| C    | -1.103945 | 2.867642  | -2.076150 |
| C    | -2.055041 | 3.836259  | -1.734668 |
| C    | -2.583911 | 3.852396  | -0.441022 |
| C    | -2.159763 | 2.909130  | 0.499752  |
| C    | -1.970531 | -1.080445 | 0.344393  |
| C    | -3.250651 | -0.797627 | 0.867125  |
| C    | -4.410119 | -1.436085 | 0.455938  |
| C    | -4.300848 | -2.433307 | -0.507858 |
| C    | -3.073734 | -2.786258 | -1.047285 |
| C    | -1.924877 | -2.111372 | -0.628431 |
| F    | -5.440879 | -3.084199 | -0.912889 |
| C    | 2.736482  | -0.246567 | 0.386735  |
| C    | 3.215271  | -1.364305 | -0.383204 |
| C    | 4.552769  | -1.534592 | -0.657495 |
| C    | 5.533523  | -0.607305 | -0.188602 |
| C    | 5.072470  | 0.506674  | 0.575412  |
| C    | 3.731684  | 0.677133  | 0.849317  |
| H    | 1.193037  | 2.035589  | 1.280200  |
| H    | 0.984161  | 0.871833  | 2.597690  |
| H    | -1.316857 | 1.096968  | 2.131421  |
| H    | 0.058933  | 1.180628  | -1.407491 |
| H    | -0.689617 | 2.842459  | -3.081718 |
| H    | -3.331244 | 4.593367  | -0.164559 |
| H    | -2.586232 | 2.916555  | 1.500863  |
| F    | -3.385609 | 0.136057  | 1.863499  |
| H    | -5.365014 | -1.169699 | 0.895697  |
| H    | -3.013294 | -3.574087 | -1.792520 |
| H    | -0.954623 | -2.366392 | -1.034525 |
| H    | 2.490171  | -2.085809 | -0.747853 |
| H    | 4.879139  | -2.392670 | -1.241505 |
| H    | 5.796487  | 1.229747  | 0.944320  |
| H    | 3.427739  | 1.541386  | 1.435794  |
| H    | -2.382832 | 4.566754  | -2.471062 |
| C    | 6.907141  | -0.788938 | -0.464977 |
| N    | 8.049792  | -0.940112 | -0.693112 |

**Table S2-16:** Cartesian Atomic Coordinates for the Geometry Optimized Structure of the Pyrazoline **2f** Radical Anion (B3LYP/6-31+G(d)).

| Atom | x/Å       | y/Å       | z/Å       |
|------|-----------|-----------|-----------|
| N    | 0.327406  | -0.854309 | 0.365135  |
| N    | -0.910362 | -0.388833 | 0.830268  |
| C    | 1.255644  | 0.045028  | 0.702076  |
| C    | 0.656991  | 1.220147  | 1.456151  |
| C    | -0.856659 | 1.049954  | 1.185288  |
| C    | -1.375994 | 1.955880  | 0.076544  |
| C    | -1.083194 | 1.700747  | -1.272123 |
| C    | -1.534590 | 2.565426  | -2.271492 |
| C    | -2.285237 | 3.699323  | -1.942379 |
| C    | -2.588320 | 3.957197  | -0.602737 |
| C    | -2.138401 | 3.087860  | 0.395245  |
| C    | -2.038425 | -1.089404 | 0.478878  |
| C    | -3.342465 | -0.762061 | 0.924239  |
| C    | -4.467986 | -1.485284 | 0.579895  |
| C    | -4.360909 | -2.625316 | -0.232017 |
| C    | -3.081613 | -2.968266 | -0.651610 |
| C    | -1.941367 | -2.251774 | -0.333139 |
| H    | -5.223187 | -3.219088 | -0.514188 |
| C    | 2.636994  | -0.105713 | 0.416496  |
| C    | 3.143495  | -1.248518 | -0.295819 |
| C    | 4.485194  | -1.399339 | -0.560838 |
| C    | 5.441568  | -0.425936 | -0.137381 |
| C    | 4.952884  | 0.713266  | 0.568994  |
| C    | 3.607680  | 0.865221  | 0.832021  |
| H    | 1.023736  | 2.194197  | 1.114227  |
| H    | 0.869244  | 1.148668  | 2.534404  |
| H    | -1.441356 | 1.229955  | 2.088288  |
| H    | -0.506543 | 0.817785  | -1.533560 |
| H    | -1.300315 | 2.351569  | -3.311875 |
| H    | -3.181921 | 4.828617  | -0.333824 |
| H    | -2.389893 | 3.284991  | 1.435701  |
| F    | -3.521695 | 0.308528  | 1.769547  |
| H    | -5.428965 | -1.156670 | 0.964666  |
| F    | -2.938190 | -4.081402 | -1.439661 |
| H    | -0.968703 | -2.559800 | -0.692458 |
| H    | 2.436516  | -2.002559 | -0.628431 |
| H    | 4.833725  | -2.276011 | -1.102594 |
| H    | 5.659260  | 1.469637  | 0.903624  |
| H    | 3.280468  | 1.749526  | 1.374047  |
| H    | -2.635114 | 4.370569  | -2.723624 |
| C    | 6.819925  | -0.586815 | -0.404720 |
| N    | 7.965918  | -0.720467 | -0.625805 |

**Table S2-17:** Cartesian Atomic Coordinates for the Geometry Optimized Structure of the Pyrazoline **2g** Radical Anion (B3LYP/6-31+G(d)).

| Atom | x/Å       | y/Å       | z/Å       |
|------|-----------|-----------|-----------|
| N    | 0.376787  | -0.824844 | 0.068646  |
| N    | -0.866536 | -0.311055 | 0.438110  |
| C    | 1.317888  | -0.029833 | 0.590391  |
| C    | 0.718205  | 1.061049  | 1.465132  |
| C    | -0.783865 | 1.006406  | 1.085831  |
| C    | -1.211754 | 2.153114  | 0.178271  |
| C    | -0.919088 | 2.135651  | -1.192922 |
| C    | -1.263560 | 3.219509  | -2.002675 |
| C    | -1.907623 | 4.335146  | -1.455979 |
| C    | -2.206438 | 4.358460  | -0.090794 |
| C    | -1.859990 | 3.272094  | 0.717778  |
| C    | -2.008915 | -1.028568 | 0.244941  |
| C    | -3.285892 | -0.485720 | 0.560223  |
| C    | -4.407560 | -1.269551 | 0.363447  |
| C    | -4.386089 | -2.567880 | -0.138920 |
| C    | -3.114662 | -3.055524 | -0.445375 |
| C    | -1.940797 | -2.350288 | -0.279693 |
| H    | -5.286571 | -3.150541 | -0.286979 |
| C    | 2.706056  | -0.213728 | 0.370653  |
| C    | 3.200470  | -1.293415 | -0.443062 |
| C    | 4.545718  | -1.475190 | -0.664713 |
| C    | 5.519277  | -0.598652 | -0.094466 |
| C    | 5.043450  | 0.473982  | 0.717254  |
| C    | 3.694506  | 0.655257  | 0.941045  |
| H    | 1.143555  | 2.054070  | 1.284600  |
| H    | 0.859008  | 0.832928  | 2.532664  |
| H    | -1.416562 | 1.013866  | 1.981990  |
| H    | -0.426058 | 1.264908  | -1.616807 |
| H    | -1.031167 | 3.192009  | -3.064748 |
| H    | -2.712315 | 5.218128  | 0.343592  |
| H    | -2.096555 | 3.289944  | 1.781071  |
| H    | -3.407592 | 0.527608  | 0.921652  |
| F    | -5.628200 | -0.730493 | 0.677876  |
| F    | -3.037332 | -4.329867 | -0.940108 |
| H    | -0.982118 | -2.785716 | -0.527444 |
| H    | 2.480450  | -1.973313 | -0.888345 |
| H    | 4.883042  | -2.300803 | -1.287844 |
| H    | 5.762174  | 1.158736  | 1.161824  |
| H    | 3.380153  | 1.488502  | 1.566088  |
| H    | -2.178484 | 5.176103  | -2.090236 |
| C    | 6.900940  | -0.786975 | -0.324449 |
| N    | 8.049344  | -0.943423 | -0.515684 |

**Table S2-18:** Cartesian Atomic Coordinates for the Geometry Optimized Structure of the Pyrazoline **2h** Radical Anion (B3LYP/6-31+G(d)).

| Atom | x/Å       | y/Å       | z/Å       |
|------|-----------|-----------|-----------|
| N    | -0.496130 | 0.750218  | 0.420818  |
| N    | 0.688420  | 0.174948  | 0.907474  |
| C    | -1.501052 | -0.078848 | 0.714633  |
| C    | -1.015392 | -1.321130 | 1.441199  |
| C    | 0.511245  | -1.270532 | 1.198764  |
| C    | 0.972404  | -2.170960 | 0.060471  |
| C    | 0.683977  | -1.862014 | -1.278904 |
| C    | 1.080664  | -2.721076 | -2.305507 |
| C    | 1.770384  | -3.903457 | -2.015207 |
| C    | 2.067926  | -4.216053 | -0.686072 |
| C    | 1.672942  | -3.352420 | 0.339957  |
| C    | 1.878501  | 0.772300  | 0.556229  |
| C    | 3.138449  | 0.351171  | 1.038531  |
| C    | 4.330081  | 0.976884  | 0.713513  |
| C    | 4.303333  | 2.097608  | -0.112866 |
| C    | 3.083289  | 2.559187  | -0.588352 |
| C    | 1.892854  | 1.921100  | -0.277676 |
| F    | 5.463297  | 2.742081  | -0.428058 |
| C    | -2.860525 | 0.193419  | 0.414192  |
| C    | -3.259356 | 1.394536  | -0.269789 |
| C    | -4.580010 | 1.664080  | -0.546070 |
| C    | -5.619542 | 0.763254  | -0.160935 |
| C    | -5.238154 | -0.431628 | 0.518704  |
| C    | -3.914209 | -0.703135 | 0.792386  |
| H    | -1.455423 | -2.250175 | 1.063909  |
| H    | -1.239808 | -1.264524 | 2.517938  |
| H    | 1.062947  | -1.535688 | 2.101806  |
| H    | 0.153847  | -0.942554 | -1.511550 |
| H    | 0.850893  | -2.465429 | -3.337426 |
| H    | 2.614358  | -5.126080 | -0.446917 |
| H    | 1.919593  | -3.593290 | 1.372376  |
| F    | 3.216435  | -0.710791 | 1.902418  |
| H    | 5.266262  | 0.604962  | 1.115323  |
| F    | 3.061542  | 3.661043  | -1.386965 |
| H    | 0.954315  | 2.294663  | -0.665179 |
| H    | -2.487395 | 2.097019  | -0.569172 |
| H    | -4.847448 | 2.580726  | -1.067381 |
| H    | -6.009738 | -1.134184 | 0.825146  |
| H    | -3.668949 | -1.623278 | 1.318070  |
| H    | 2.077248  | -4.569939 | -2.818217 |
| C    | -6.976525 | 1.046550  | -0.437242 |
| N    | -8.105131 | 1.281083  | -0.663298 |

**Table S2-19:** Cartesian Atomic Coordinates for the Geometry Optimized Structure of the Pyrazoline **2i** Radical Anion (B3LYP/6-31+G(d)).

| Atom | x/Å       | y/Å       | z/Å       |
|------|-----------|-----------|-----------|
| N    | -0.624350 | 0.767614  | 0.430493  |
| N    | 0.610792  | 0.227329  | 0.795759  |
| C    | -1.567000 | -0.133170 | 0.707693  |
| C    | -0.994185 | -1.386168 | 1.350116  |
| C    | 0.525877  | -1.227708 | 1.116971  |
| C    | 1.071527  | -2.093275 | -0.008767 |
| C    | 0.690568  | -1.868813 | -1.342446 |
| C    | 1.181471  | -2.680565 | -2.365521 |
| C    | 2.060312  | -3.731758 | -2.075890 |
| C    | 2.447871  | -3.959482 | -0.753444 |
| C    | 1.958920  | -3.140599 | 0.270058  |
| C    | 1.775247  | 0.854892  | 0.426476  |
| C    | 2.983592  | 0.636593  | 1.141914  |
| C    | 4.166300  | 1.278337  | 0.822499  |
| C    | 4.247477  | 2.212443  | -0.206847 |
| C    | 3.072224  | 2.446041  | -0.915087 |
| C    | 1.879653  | 1.791323  | -0.641857 |
| H    | 5.172006  | 2.721898  | -0.447655 |
| C    | -2.950512 | 0.075738  | 0.469733  |
| C    | -3.439103 | 1.272069  | -0.161227 |
| C    | -4.781233 | 1.471802  | -0.387128 |
| C    | -5.754858 | 0.500794  | 0.002925  |
| C    | -5.283587 | -0.687676 | 0.634852  |
| C    | -3.937802 | -0.889015 | 0.858888  |
| H    | -1.374911 | -2.311676 | 0.904066  |
| H    | -1.223371 | -1.422876 | 2.425782  |
| H    | 1.089289  | -1.437614 | 2.027460  |
| H    | 0.016283  | -1.047522 | -1.572624 |
| H    | 0.880964  | -2.489904 | -3.393272 |
| H    | 3.137371  | -4.767051 | -0.516552 |
| H    | 2.272779  | -3.314344 | 1.297613  |
| F    | 2.984061  | -0.201482 | 2.214571  |
| F    | 5.272741  | 1.011075  | 1.566314  |
| F    | 3.100591  | 3.318017  | -1.956547 |
| F    | 0.841383  | 2.026705  | -1.469249 |
| H    | -2.717240 | 2.023570  | -0.466618 |
| H    | -5.117915 | 2.385178  | -0.872659 |
| H    | -6.003232 | -1.442255 | 0.944145  |
| H    | -3.622564 | -1.807424 | 1.349071  |
| H    | 2.442217  | -4.361911 | -2.875958 |
| C    | -7.133636 | 0.711146  | -0.225191 |
| N    | -8.280069 | 0.885829  | -0.413528 |



**Table S2-20:** Cartesian Atomic Coordinates for the Geometry Optimized Structure of the Pyrazoline **2j** Radical Anion (B3LYP/6-31+G(d)).

| Atom | x/Å       | y/Å       | z/Å       |
|------|-----------|-----------|-----------|
| N    | -0.788757 | -0.694822 | -0.458319 |
| N    | 0.407506  | -0.076232 | -0.842069 |
| C    | -1.786862 | 0.150896  | -0.715207 |
| C    | -1.297872 | 1.441121  | -1.351563 |
| C    | 0.230578  | 1.377697  | -1.128688 |
| C    | 0.726695  | 2.254455  | 0.011322  |
| C    | 0.335380  | 2.007251  | 1.338542  |
| C    | 0.782518  | 2.828914  | 2.373653  |
| C    | 1.627096  | 3.912985  | 2.104090  |
| C    | 2.024572  | 4.164068  | 0.788675  |
| C    | 1.579792  | 3.335482  | -0.247000 |
| C    | 1.610405  | -0.630704 | -0.471091 |
| C    | 2.790880  | -0.370804 | -1.212809 |
| C    | 4.017265  | -0.944799 | -0.917801 |
| C    | 4.135604  | -1.854071 | 0.131671  |
| C    | 3.000411  | -2.143754 | 0.883774  |
| C    | 1.779527  | -1.535280 | 0.613132  |
| F    | 5.321330  | -2.444984 | 0.404800  |
| C    | -3.152331 | -0.147678 | -0.467153 |
| C    | -3.555615 | -1.382930 | 0.149603  |
| C    | -4.879461 | -1.674321 | 0.383275  |
| C    | -5.918043 | -0.764173 | 0.015732  |
| C    | -5.531757 | 0.461680  | -0.602717 |
| C    | -4.204326 | 0.755189  | -0.834502 |
| H    | -1.733094 | 2.337784  | -0.897901 |
| H    | -1.534736 | 1.469498  | -2.425991 |
| H    | 0.775327  | 1.641246  | -2.037546 |
| H    | -0.313417 | 1.162193  | 1.554724  |
| H    | 0.473945  | 2.620233  | 3.395493  |
| H    | 2.687106  | 4.998121  | 0.567124  |
| H    | 1.899980  | 3.530210  | -1.268908 |
| F    | 2.732370  | 0.444066  | -2.297522 |
| F    | 5.096549  | -0.657275 | -1.678386 |
| F    | 3.106312  | -2.984410 | 1.935109  |
| F    | 0.775452  | -1.794459 | 1.471166  |
| H    | -2.783474 | -2.090471 | 0.436411  |
| H    | -5.150246 | -2.614758 | 0.858308  |
| H    | -6.302309 | 1.171021  | -0.895958 |
| H    | -3.956360 | 1.698329  | -1.316729 |
| H    | 1.973929  | 4.551487  | 2.913390  |
| C    | -7.278367 | -1.066176 | 0.251996  |
| N    | -8.410364 | -1.313463 | 0.446028  |

**Table S3:** Summary of Computational Data for Pyrazolines **1a-j** and **2a-j** (B3LYP/6-31+G(d)//B3LYP/6-31+G(d) level of theory).

| Compound  | Neutral Species |                           | Radical Anion   |                           | AEA [eV] <sup>b</sup> |
|-----------|-----------------|---------------------------|-----------------|---------------------------|-----------------------|
|           | SCF energy [au] | ZPVE <sup>a</sup> [J/mol] | SCF energy [au] | ZPVE <sup>a</sup> [J/mol] |                       |
| <b>1a</b> | -920.5868       | 211.4                     | -920.5983       | 208.1                     | 0.450                 |
| <b>1b</b> | -1019.8252      | 206.2                     | -1019.8391      | 203.0                     | 0.514                 |
| <b>1c</b> | -1019.8311      | 206.2                     | -1019.8472      | 202.9                     | 0.578                 |
| <b>1d</b> | -1019.8290      | 206.1                     | -1019.8431      | 202.6                     | 0.534                 |
| <b>1e</b> | -1119.0663      | 200.9                     | -1119.0832      | 197.8                     | 0.594                 |
| <b>1f</b> | -1119.0677      | 201.1                     | -1119.0863      | 197.8                     | 0.649                 |
| <b>1g</b> | -1119.0742      | 200.8                     | -1119.0947      | 197.8                     | 0.689                 |
| <b>1h</b> | -1218.3013      | 195.8                     | -1218.3229      | 192.6                     | 0.723                 |
| <b>1i</b> | -1317.5288      | 190.7                     | -1317.5470      | 187.0                     | 0.650                 |
| <b>1j</b> | -1416.7546      | 185.6                     | -1416.7757      | 181.9                     | 0.729                 |
| <b>2a</b> | -1012.8337      | 210.5                     | -1012.8732      | 207.8                     | 1.189                 |
| <b>2b</b> | -1112.0719      | 205.2                     | -1112.1137      | 202.8                     | 1.240                 |
| <b>2c</b> | -1112.0775      | 205.3                     | -1112.1216      | 202.9                     | 1.303                 |
| <b>2d</b> | -1112.0755      | 205.1                     | -1112.1178      | 202.5                     | 1.264                 |
| <b>2e</b> | -1211.3126      | 199.9                     | -1211.3571      | 197.6                     | 1.309                 |
| <b>2f</b> | -1211.3138      | 200.1                     | -1211.3598      | 197.6                     | 1.359                 |
| <b>2g</b> | -1211.3200      | 199.9                     | -1211.3680      | 197.5                     | 1.408                 |
| <b>2h</b> | -1310.5474      | 195.0                     | -1310.5957      | 192.4                     | 1.421                 |
| <b>2i</b> | -1409.7747      | 189.6                     | -1409.8201      | 187.1                     | 1.341                 |
| <b>2j</b> | -1509.0005      | 184.5                     | -1509.0473      | 181.8                     | 1.388                 |

<sup>a</sup>Unscaled zero point vibrational energy from frequency calculation; <sup>b</sup>Adiabatic electron affinity with ZPVE correction (ZPVE scaled by a factor of 0.9804).

**Table S4:** Summary of Computational Data for Pyrazolines **1a-j** and **2a-j** (B3LYP/6-311+G(2d,2p)//B3LYP/6-31+G(d) level of theory).

| Compound  | Neutral            | Anion              | AEA [eV] <sup>a</sup> | TD-DFT <sup>b</sup>  |                        |
|-----------|--------------------|--------------------|-----------------------|----------------------|------------------------|
|           | SCF energy<br>[au] | SCF energy<br>[au] |                       | S1 [eV] <sup>c</sup> | Oscillator<br>Strength |
| <b>1a</b> | -920.8198          | -920.8328          | 0.495                 | 3.409                | 0.649                  |
| <b>1b</b> | -1020.0860         | -1020.1013         | 0.552                 | 3.502                | 0.633                  |
| <b>1c</b> | -1020.0917         | -1020.1091         | 0.611                 | 3.463                | 0.664                  |
| <b>1d</b> | -1020.0895         | -1020.1049         | 0.565                 | 3.428                | 0.613                  |
| <b>1e</b> | -1119.3548         | -1119.3724         | 0.614                 | 3.490                | 0.560                  |
| <b>1f</b> | -1119.3563         | -1119.3759         | 0.674                 | 3.519                | 0.652                  |
| <b>1g</b> | -1119.3628         | -1119.3842         | 0.715                 | 3.541                | 0.688                  |
| <b>1h</b> | -1218.6181         | -1218.6403         | 0.739                 | 3.492                | 0.591                  |
| <b>1i</b> | -1317.8741         | -1317.8928         | 0.666                 | 3.766                | 0.837                  |
| <b>1j</b> | -1417.1284         | -1417.1485         | 0.701                 | 3.790                | 0.768                  |
| <b>2a</b> | -1013.0889         | -1013.1300         | 1.234                 | 3.105                | 0.870                  |
| <b>2b</b> | -1112.3550         | -1112.3981         | 1.278                 | 3.228                | 0.904                  |
| <b>2c</b> | -1112.3604         | -1112.4059         | 1.340                 | 3.147                | 0.846                  |
| <b>2d</b> | -1112.3583         | -1112.4019         | 1.297                 | 3.099                | 0.833                  |
| <b>2e</b> | -1211.6234         | -1211.6690         | 1.340                 | 3.232                | 0.857                  |
| <b>2f</b> | -1211.6246         | -1211.6721         | 1.398                 | 3.249                | 0.890                  |
| <b>2g</b> | -1211.6308         | -1211.6800         | 1.441                 | 3.214                | 0.860                  |
| <b>2h</b> | -1310.8865         | -1310.9357         | 1.448                 | 3.246                | 0.851                  |
| <b>2i</b> | -1410.1422         | -1410.1887         | 1.372                 | 3.491                | 1.036                  |
| <b>2j</b> | -1509.3967         | -1509.4442         | 1.409                 | 3.510                | 0.973                  |

<sup>a</sup>Adiabatic electron affinity with ZPVE correction at B3LYP/6-31+G(d) level (ZPVE scaled by a factor of 0.9804).

<sup>b</sup>Time-dependent density functional theory calculation; <sup>c</sup>Lowest excited singlet state energy.

**Table S5:** Summary of Computational Data for Pyrazolines **1a-j** and **2a-j**: Estimation of the Reduction Potential Based on Semiempirical Solvent Stabilization Energies (SM5.42R/AM1//B3LYP/6-31+G(d) level of theory).

| Compound  | AEA [eV] <sup>a</sup> | Solvent Stabilization Energy <sup>b</sup> |                         |                                    | $E_{\text{red}}$ [eV] <sup>f</sup> |
|-----------|-----------------------|-------------------------------------------|-------------------------|------------------------------------|------------------------------------|
|           |                       | Neutral [eV] <sup>c</sup>                 | Anion [eV] <sup>d</sup> | $\Delta\Delta G$ [eV] <sup>e</sup> |                                    |
| <b>1a</b> | 0.495                 | -0.673                                    | -2.532                  | -1.858                             | -2.79                              |
| <b>1b</b> | 0.552                 | -0.681                                    | -2.509                  | -1.828                             | -2.76                              |
| <b>1c</b> | 0.611                 | -0.651                                    | -2.401                  | -1.749                             | -2.78                              |
| <b>1d</b> | 0.565                 | -0.642                                    | -2.412                  | -1.770                             | -2.81                              |
| <b>1e</b> | 0.614                 | -0.625                                    | -2.358                  | -1.733                             | -2.80                              |
| <b>1f</b> | 0.674                 | -0.645                                    | -2.402                  | -1.757                             | -2.71                              |
| <b>1g</b> | 0.715                 | -0.602                                    | -2.281                  | -1.679                             | -2.75                              |
| <b>1h</b> | 0.739                 | -0.596                                    | -2.242                  | -1.646                             | -2.76                              |
| <b>1i</b> | 0.666                 | -0.607                                    | -2.252                  | -1.645                             | -2.83                              |
| <b>1j</b> | 0.701                 | -0.529                                    | -2.715                  |                                    |                                    |
| <b>2a</b> | 1.234                 | -0.724                                    | -2.296                  | -1.572                             | -2.34                              |
| <b>2b</b> | 1.278                 | -0.740                                    | -2.267                  | -1.528                             | -2.34                              |
| <b>2c</b> | 1.340                 | -0.715                                    | -2.187                  | -1.472                             | -2.33                              |
| <b>2d</b> | 1.297                 | -0.709                                    | -2.192                  | -1.483                             | -2.36                              |
| <b>2e</b> | 1.340                 | -0.690                                    | -2.136                  | -1.446                             | -2.36                              |
| <b>2f</b> | 1.398                 | -0.704                                    | -2.185                  | -1.481                             | -2.26                              |
| <b>2g</b> | 1.441                 | -0.675                                    | -2.089                  | -1.414                             | -2.29                              |
| <b>2h</b> | 1.448                 | -0.667                                    | -2.070                  | -1.403                             | -2.29                              |
| <b>2i</b> | 1.372                 | -0.665                                    | -2.158                  | -1.493                             | -2.28                              |
| <b>2j</b> | 1.409                 | -0.599                                    | -1.990                  | -1.392                             | -2.34                              |

<sup>a</sup>Adiabatic electron affinity with ZPVE correction at B3LYP/6-311+G(2d,2p)//B3LYP/6-31+G(d) level (ZPVE scaled by a factor of 0.9804); <sup>b</sup>Solvation energy of the corresponding gas-phase species in acetonitrile calculated with the semi-empirical SM5.42R/AM1 solvation model; <sup>c</sup>Based on gas-phase geometry of the neutral compound optimized at B3LYP/6-31+G(d) level; <sup>d</sup>Based on gas-phase geometry of the radical anion optimized at B3LYP/6-31+G(d) level; <sup>e</sup>Differential solvent stabilization energy; <sup>f</sup>Computed reduction potential based on equation (14) with  $E_{\text{ref}}(\text{Fc}^{+/0}/\text{MeCN}) = 5.144$  V.
